# Supplementary material for: Navigating outpatient care of patients with type 2 diabetes after hospital discharge - a qualitative longitudinal study
Source: Springer Nature journal article supplement (doi:10.1186/s12913-024-10959-4), 2024-04-17

## Additional File 2: individual patient journey mappings from discharge to 2 months post-discharge

-  insulin treatment on discharge from hospital
-  Type 2 diabetes diagnosed during hospitalization or within the last 6 months
-  Encounters: **hospital**, **OCP**, **CP**, **GP**, **specialist physician**, **other HCPs**
-  Phone call
-  Important/Main medication changes
-  Vaccine

AN: addictology nurse  
CP: community pharmacist  
DN: diabetes nurse  
GP: general practitioner  
HM: home nurse  
OCP: Outpatient community pharmacist

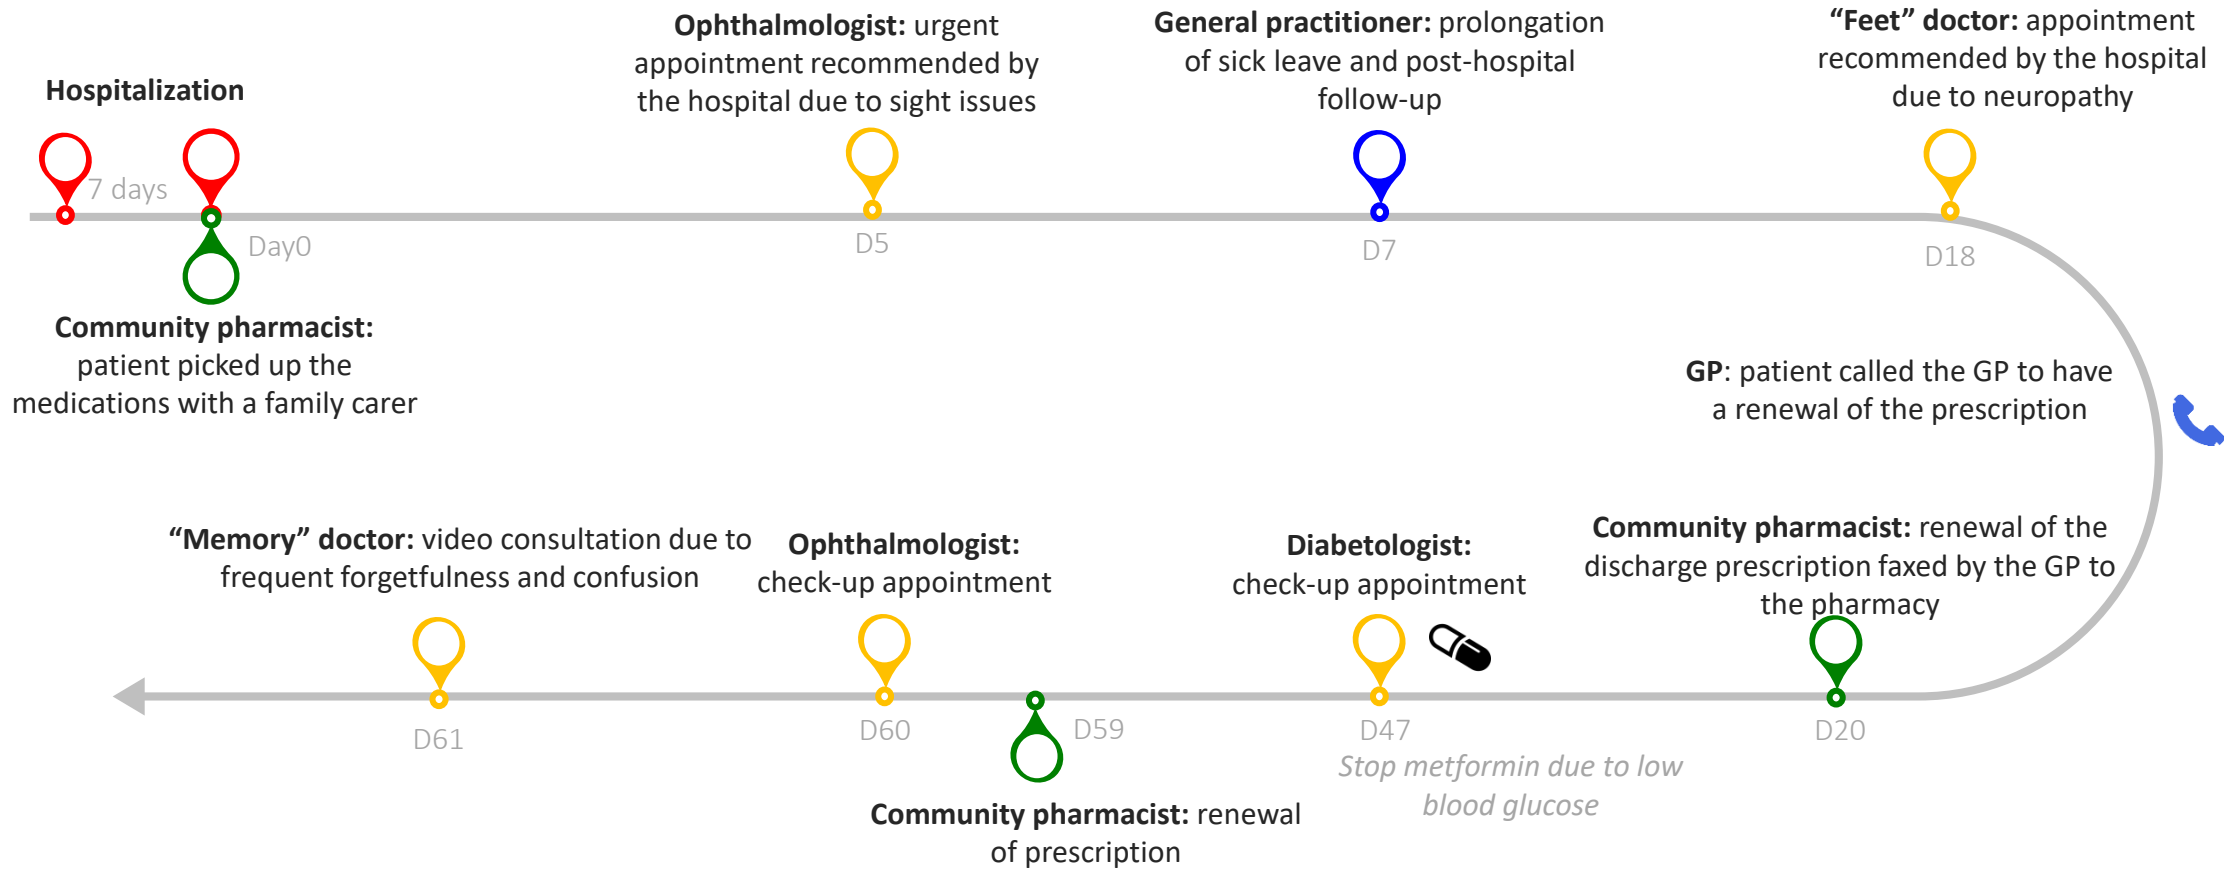

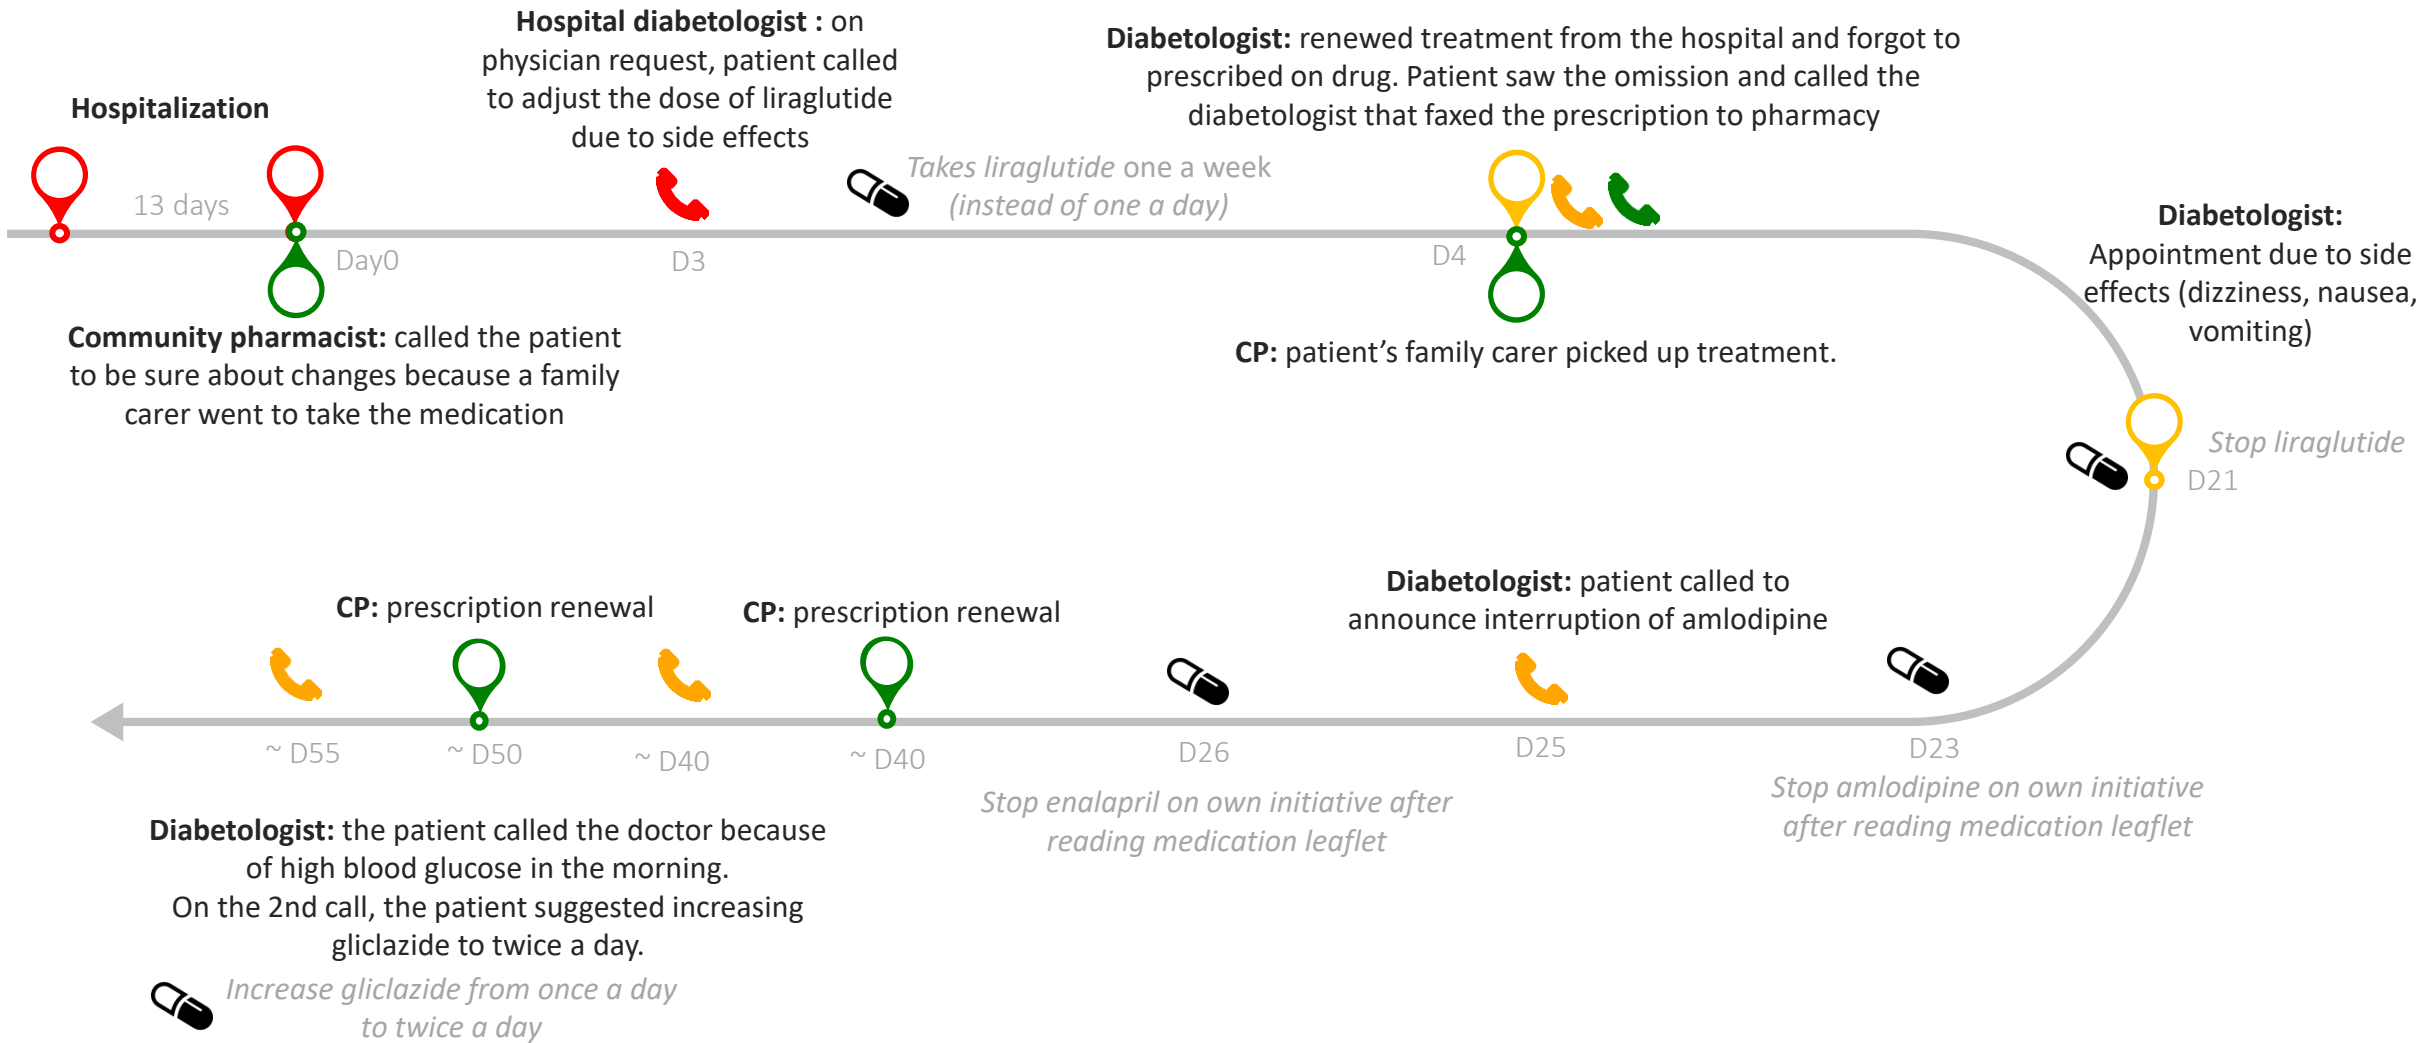

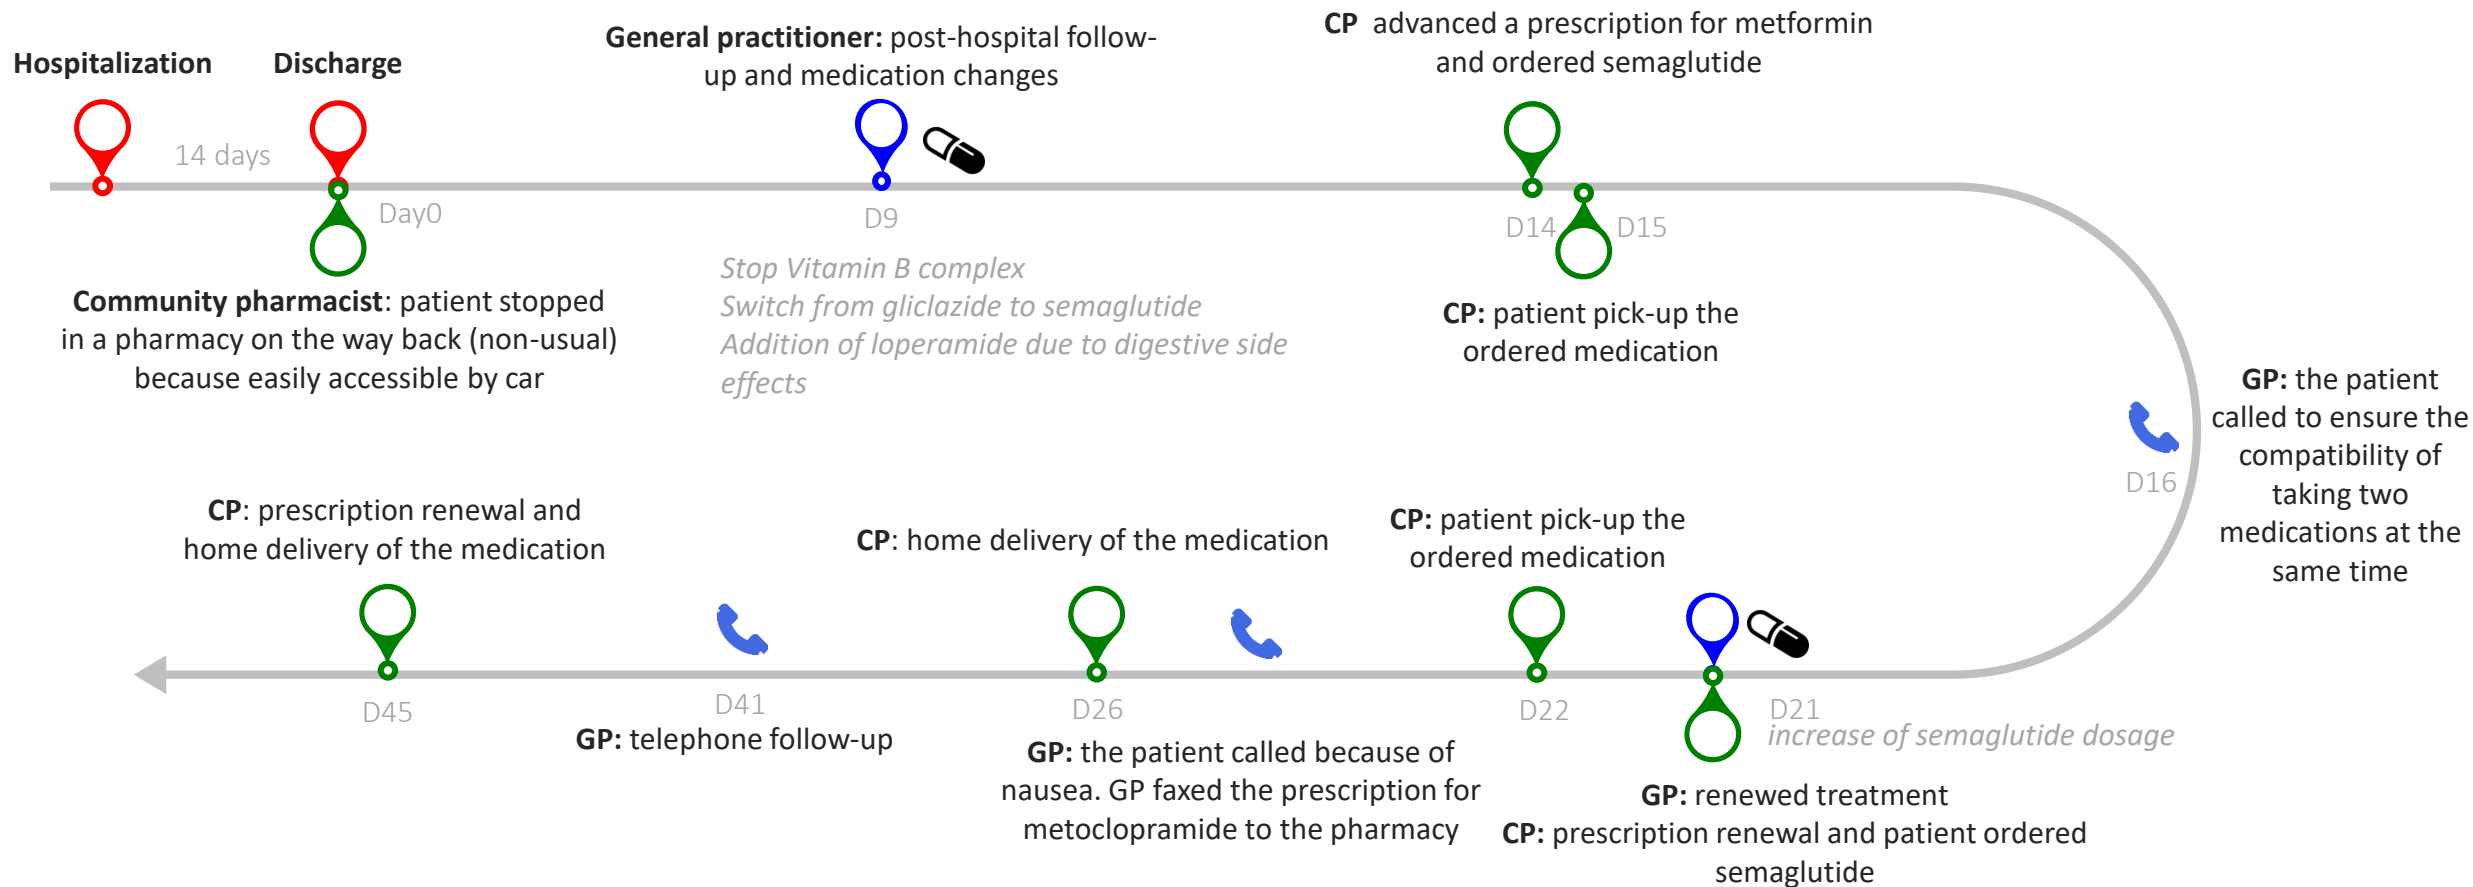

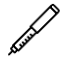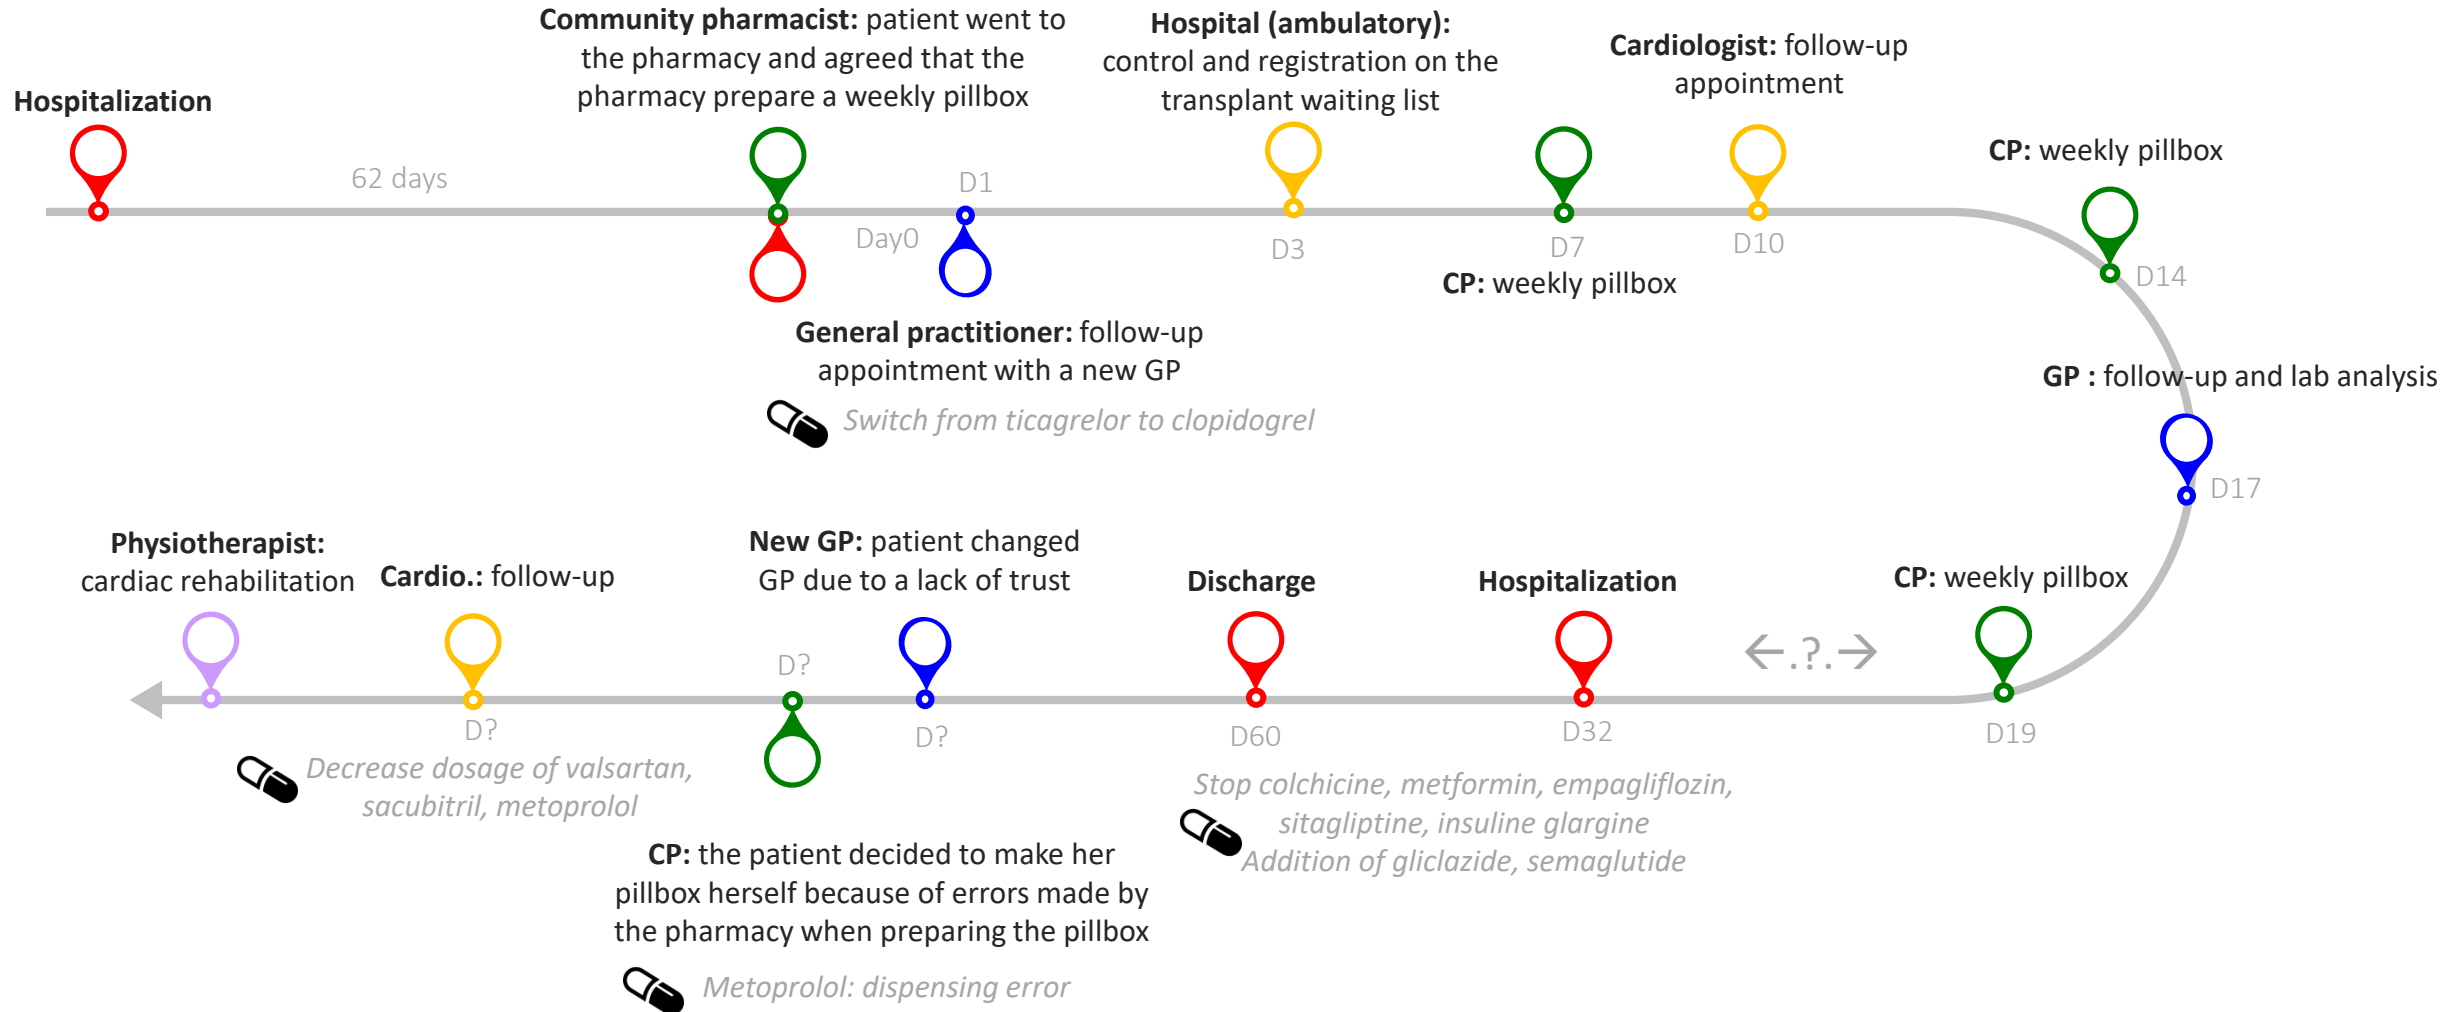

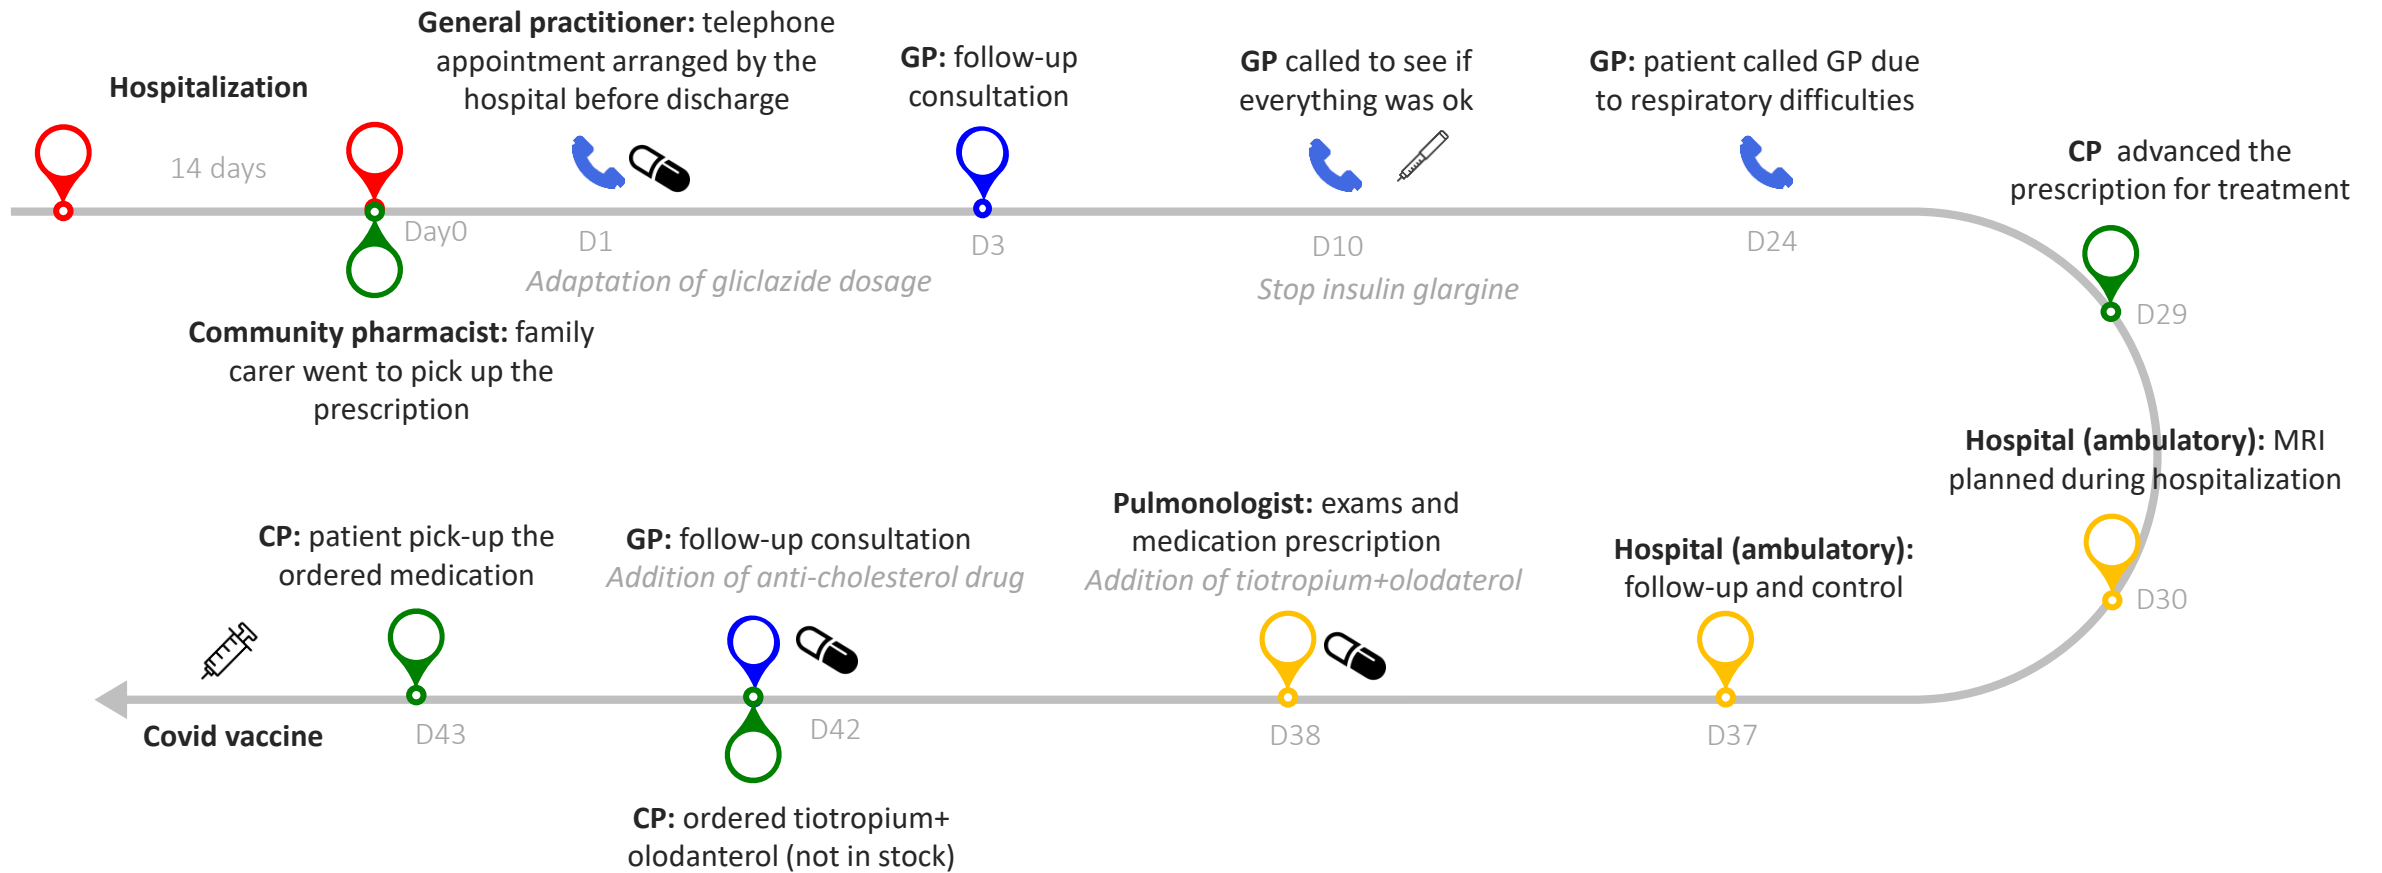

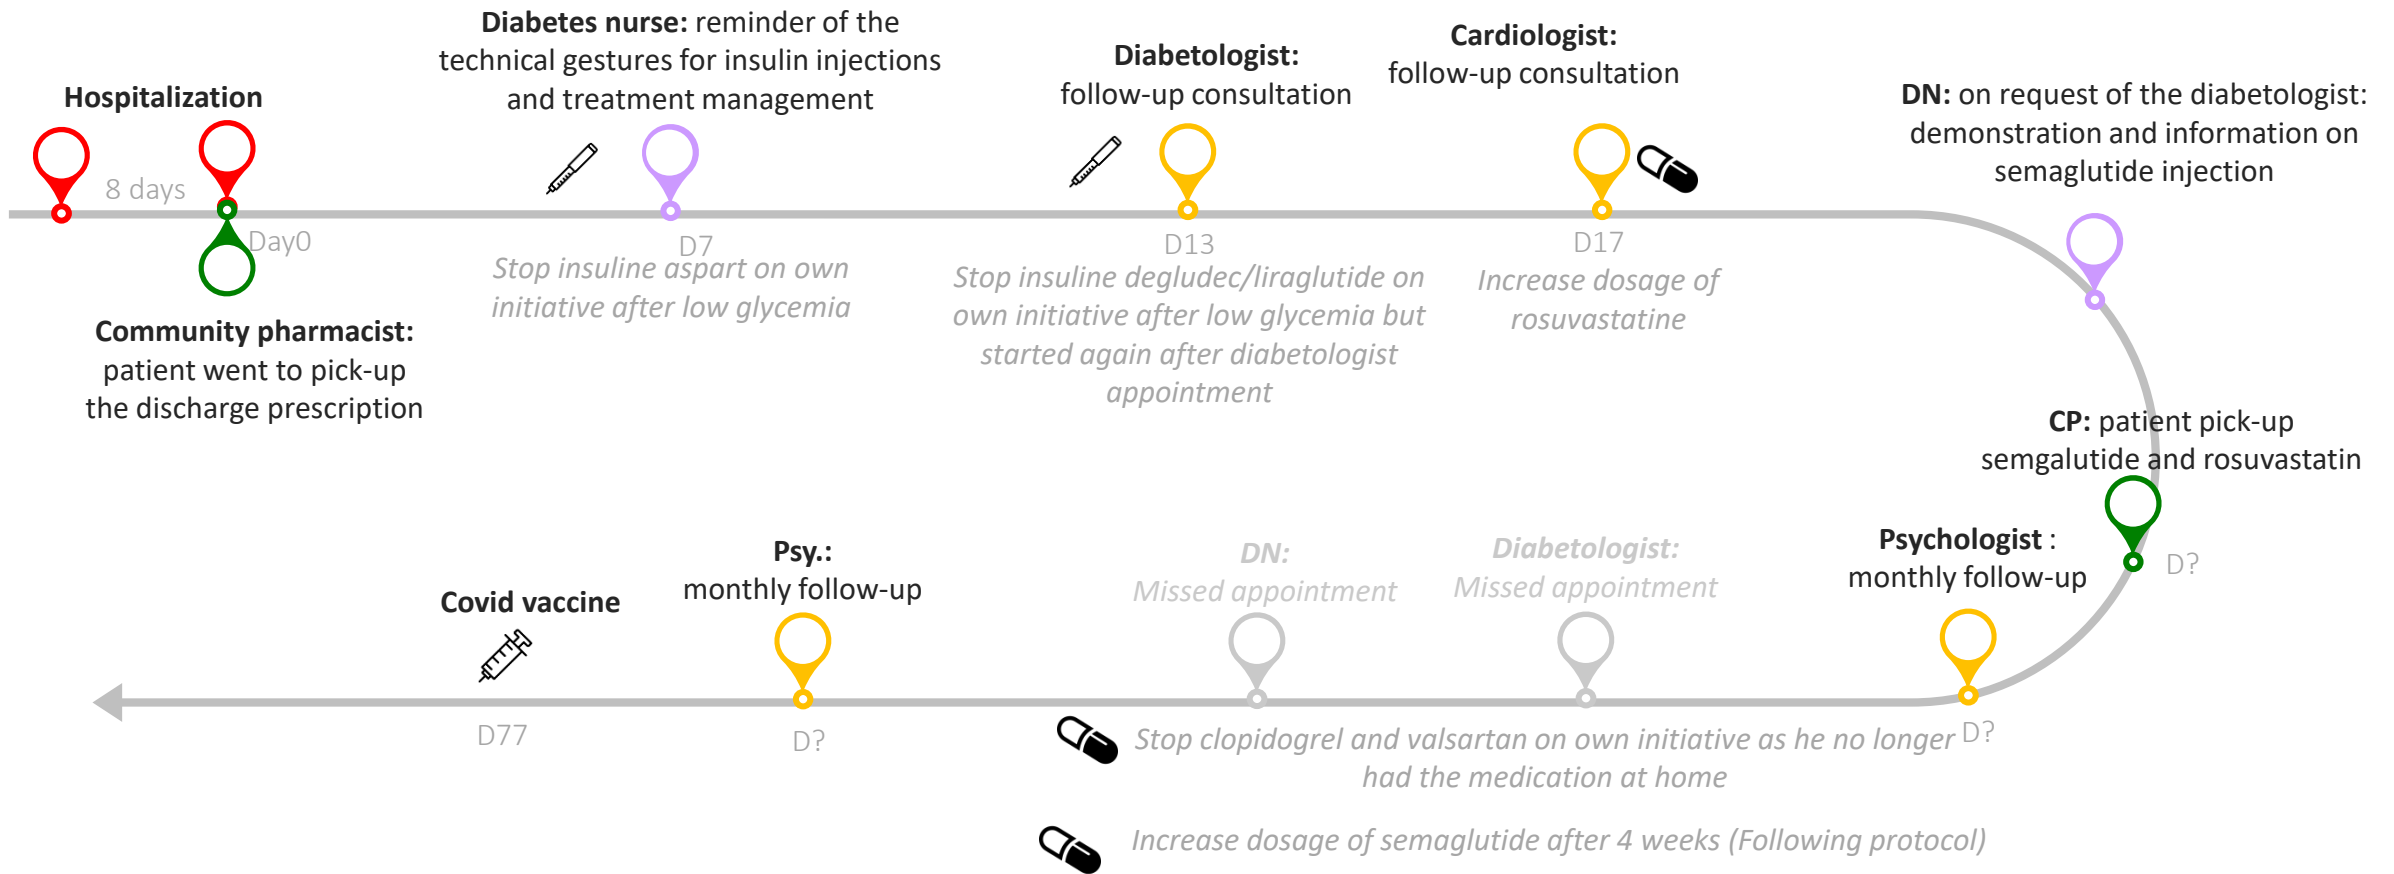

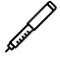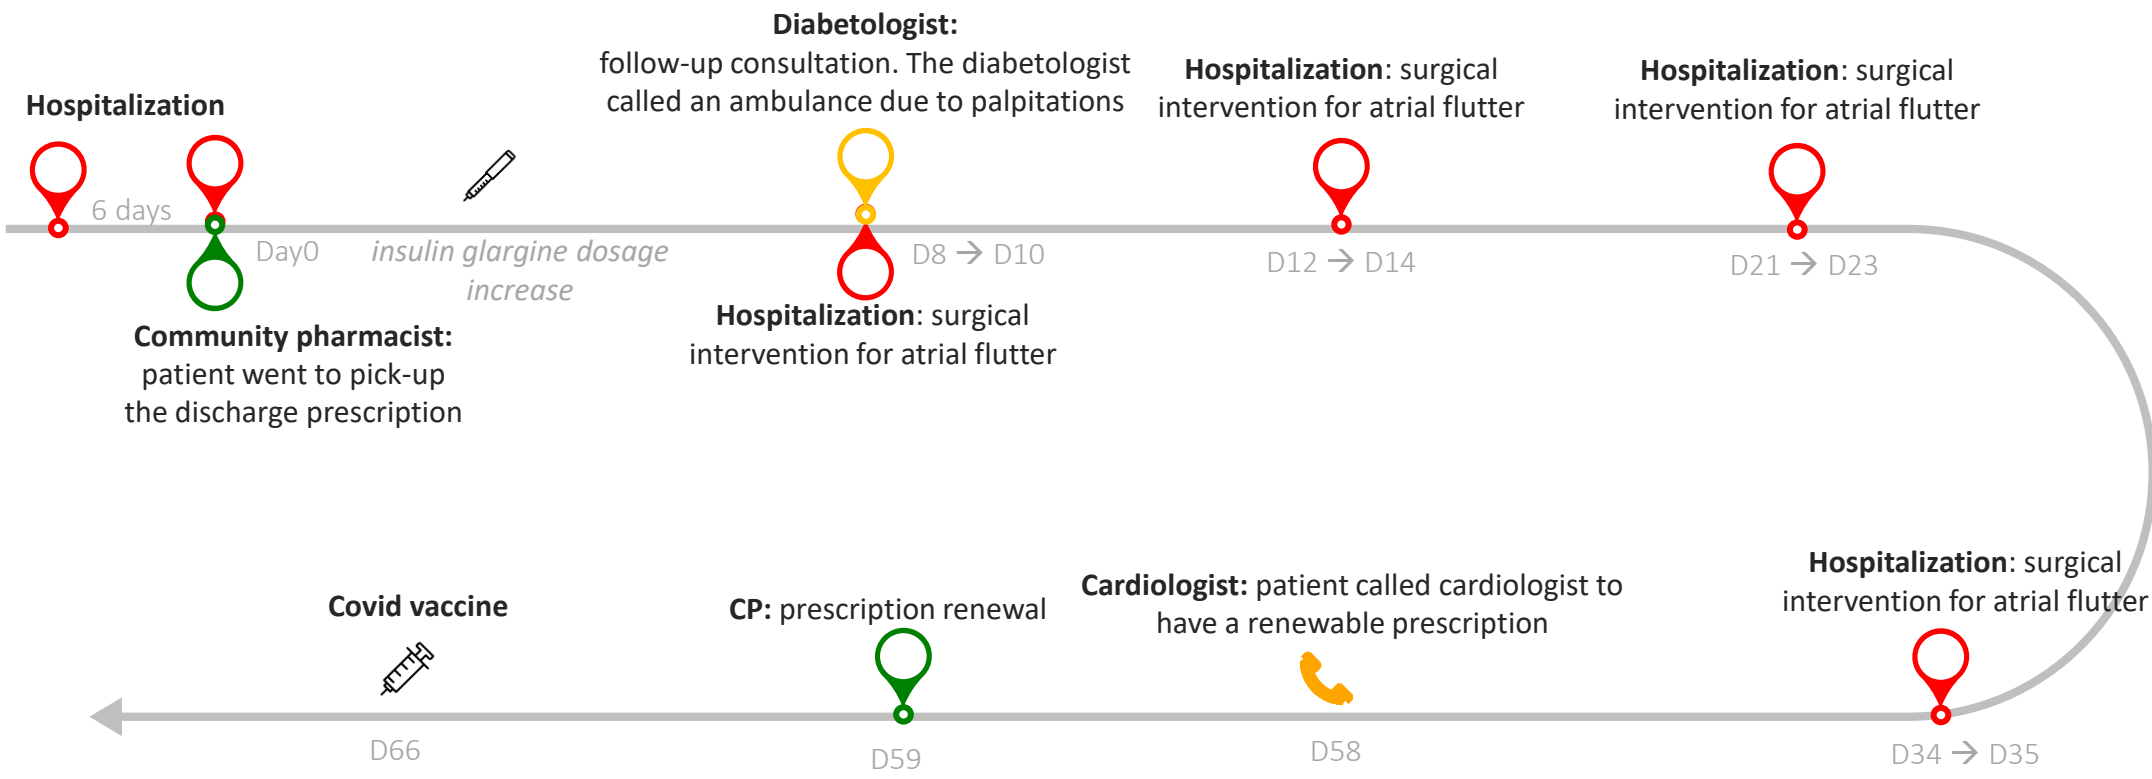



**Hospitalization**

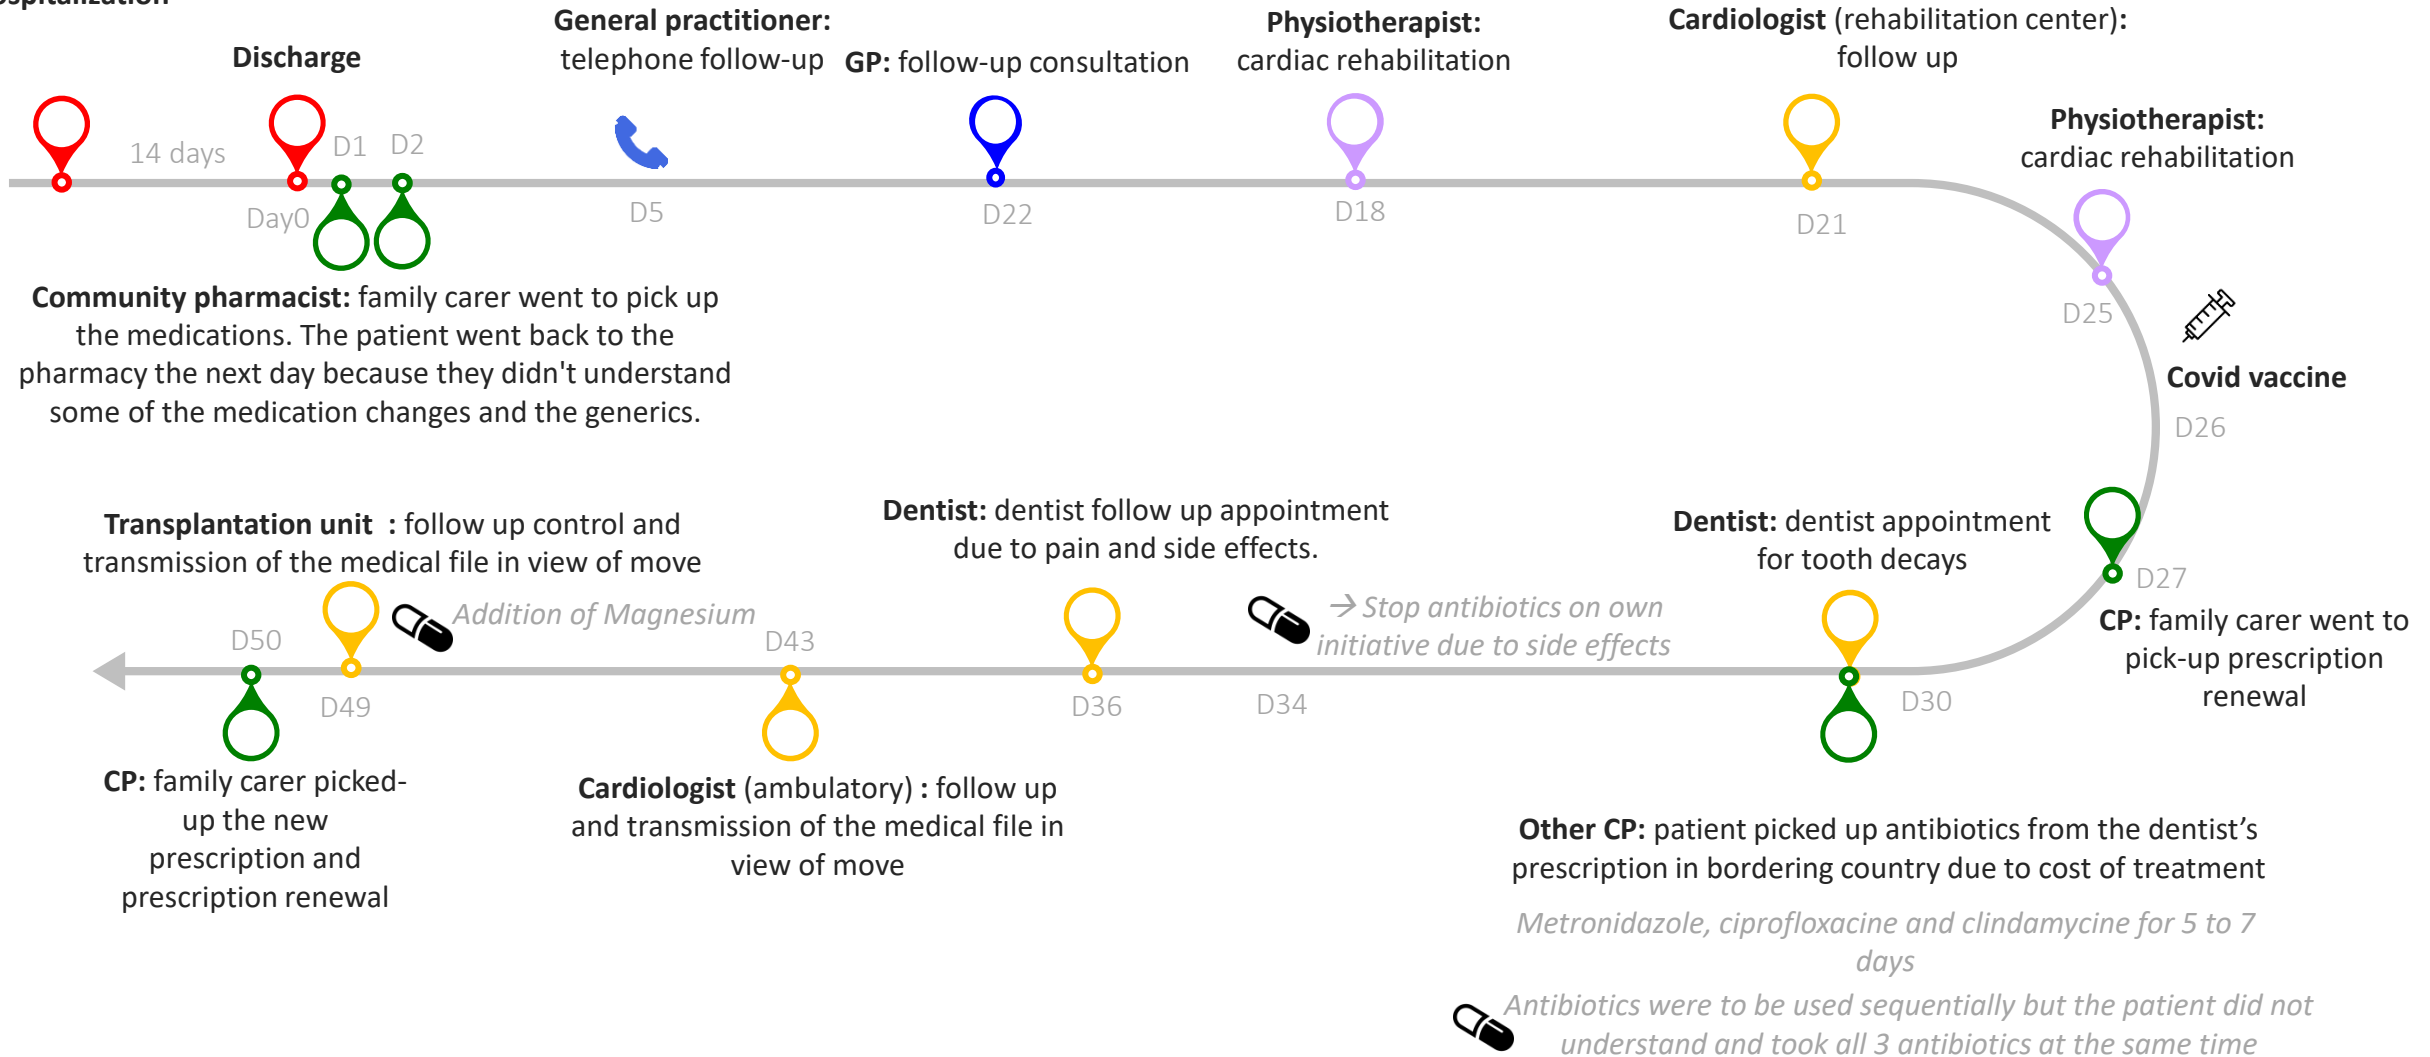

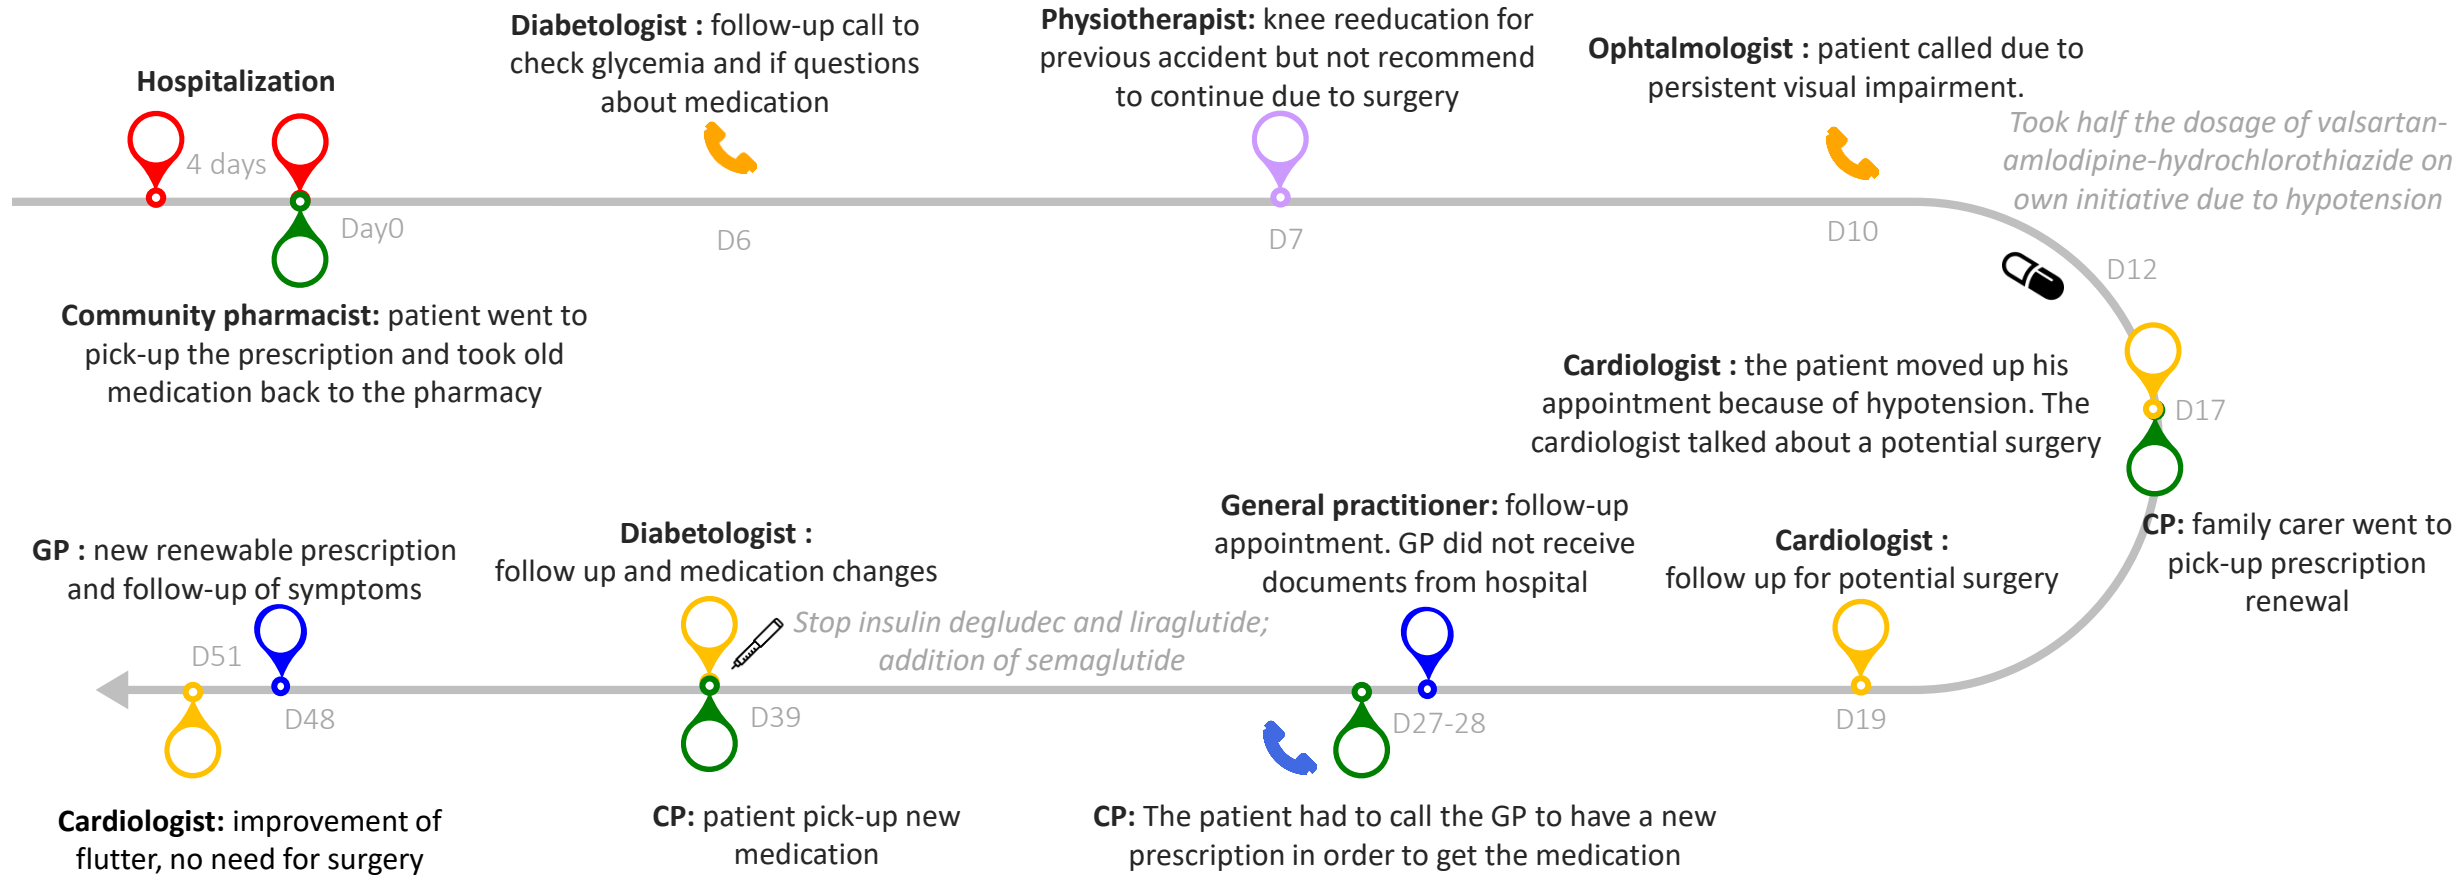

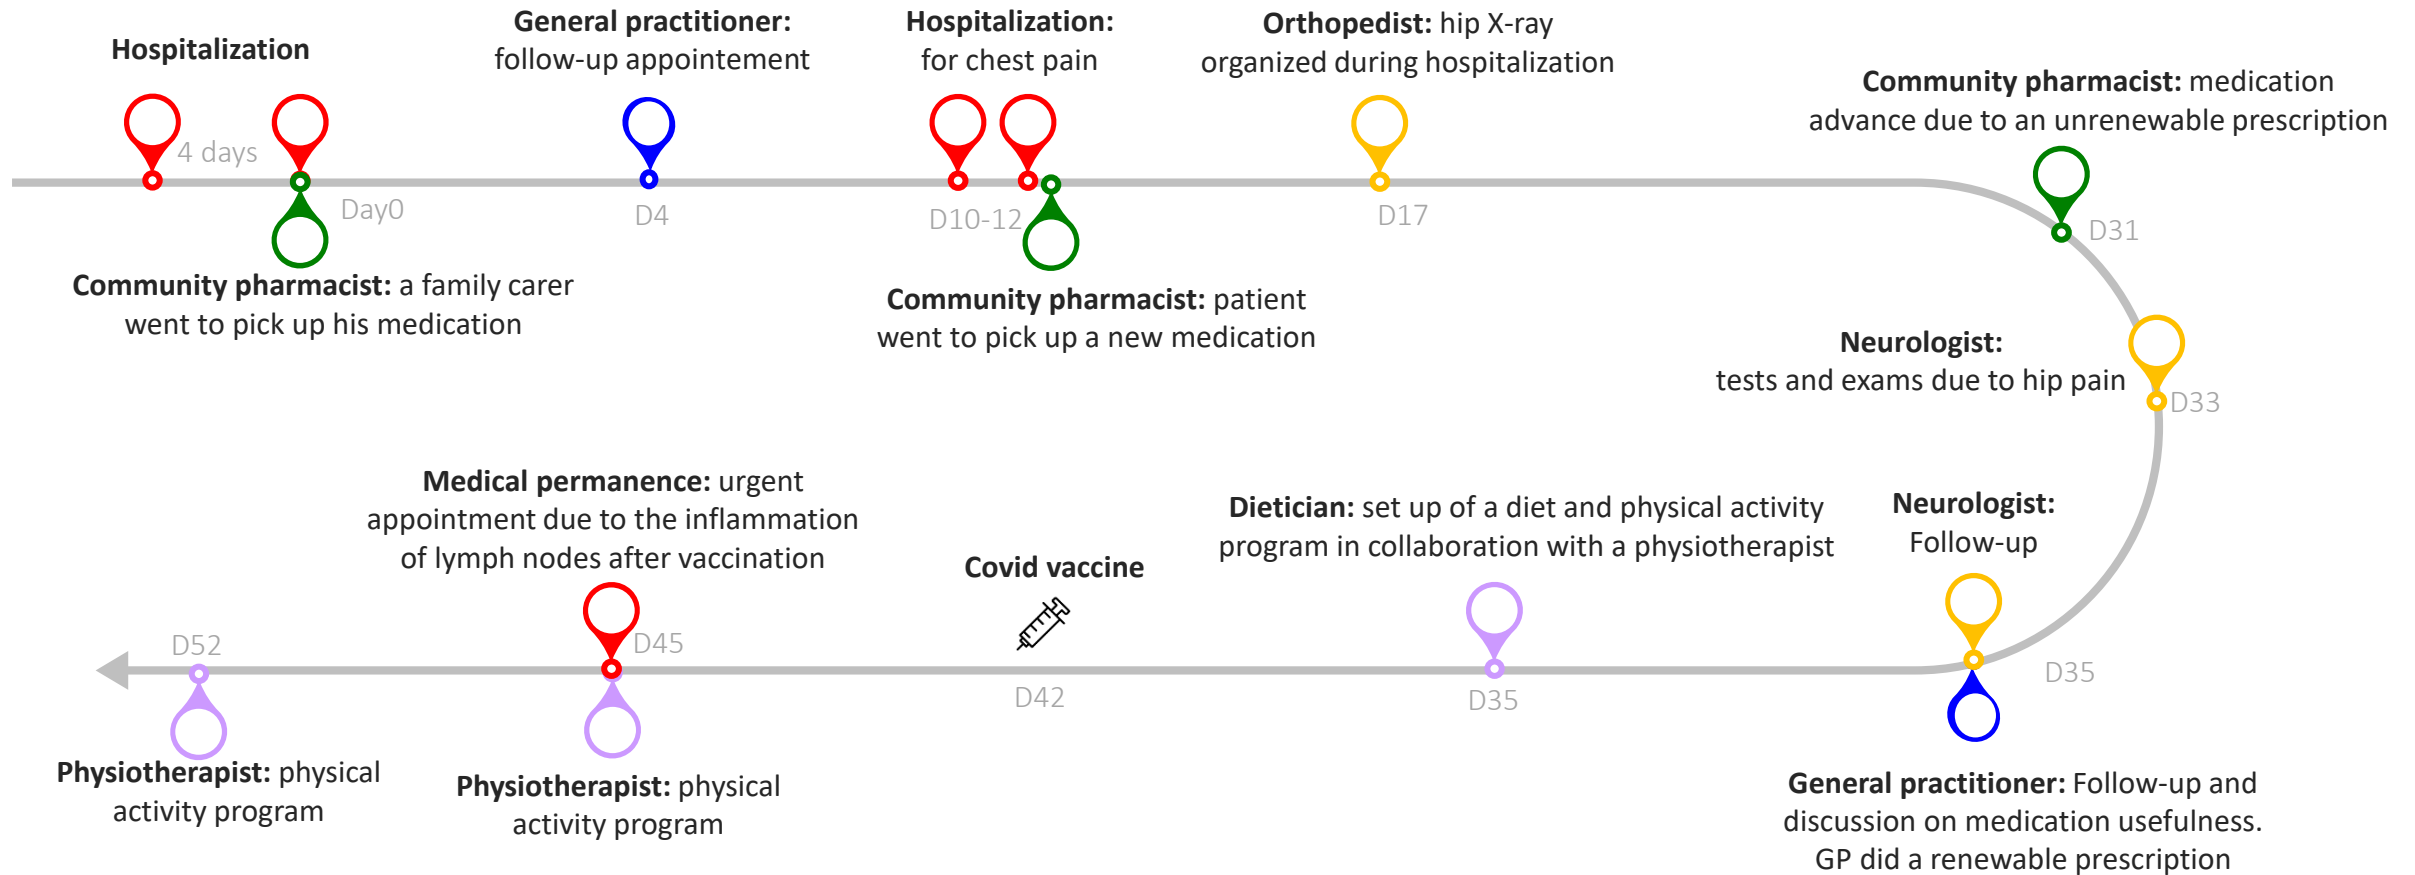

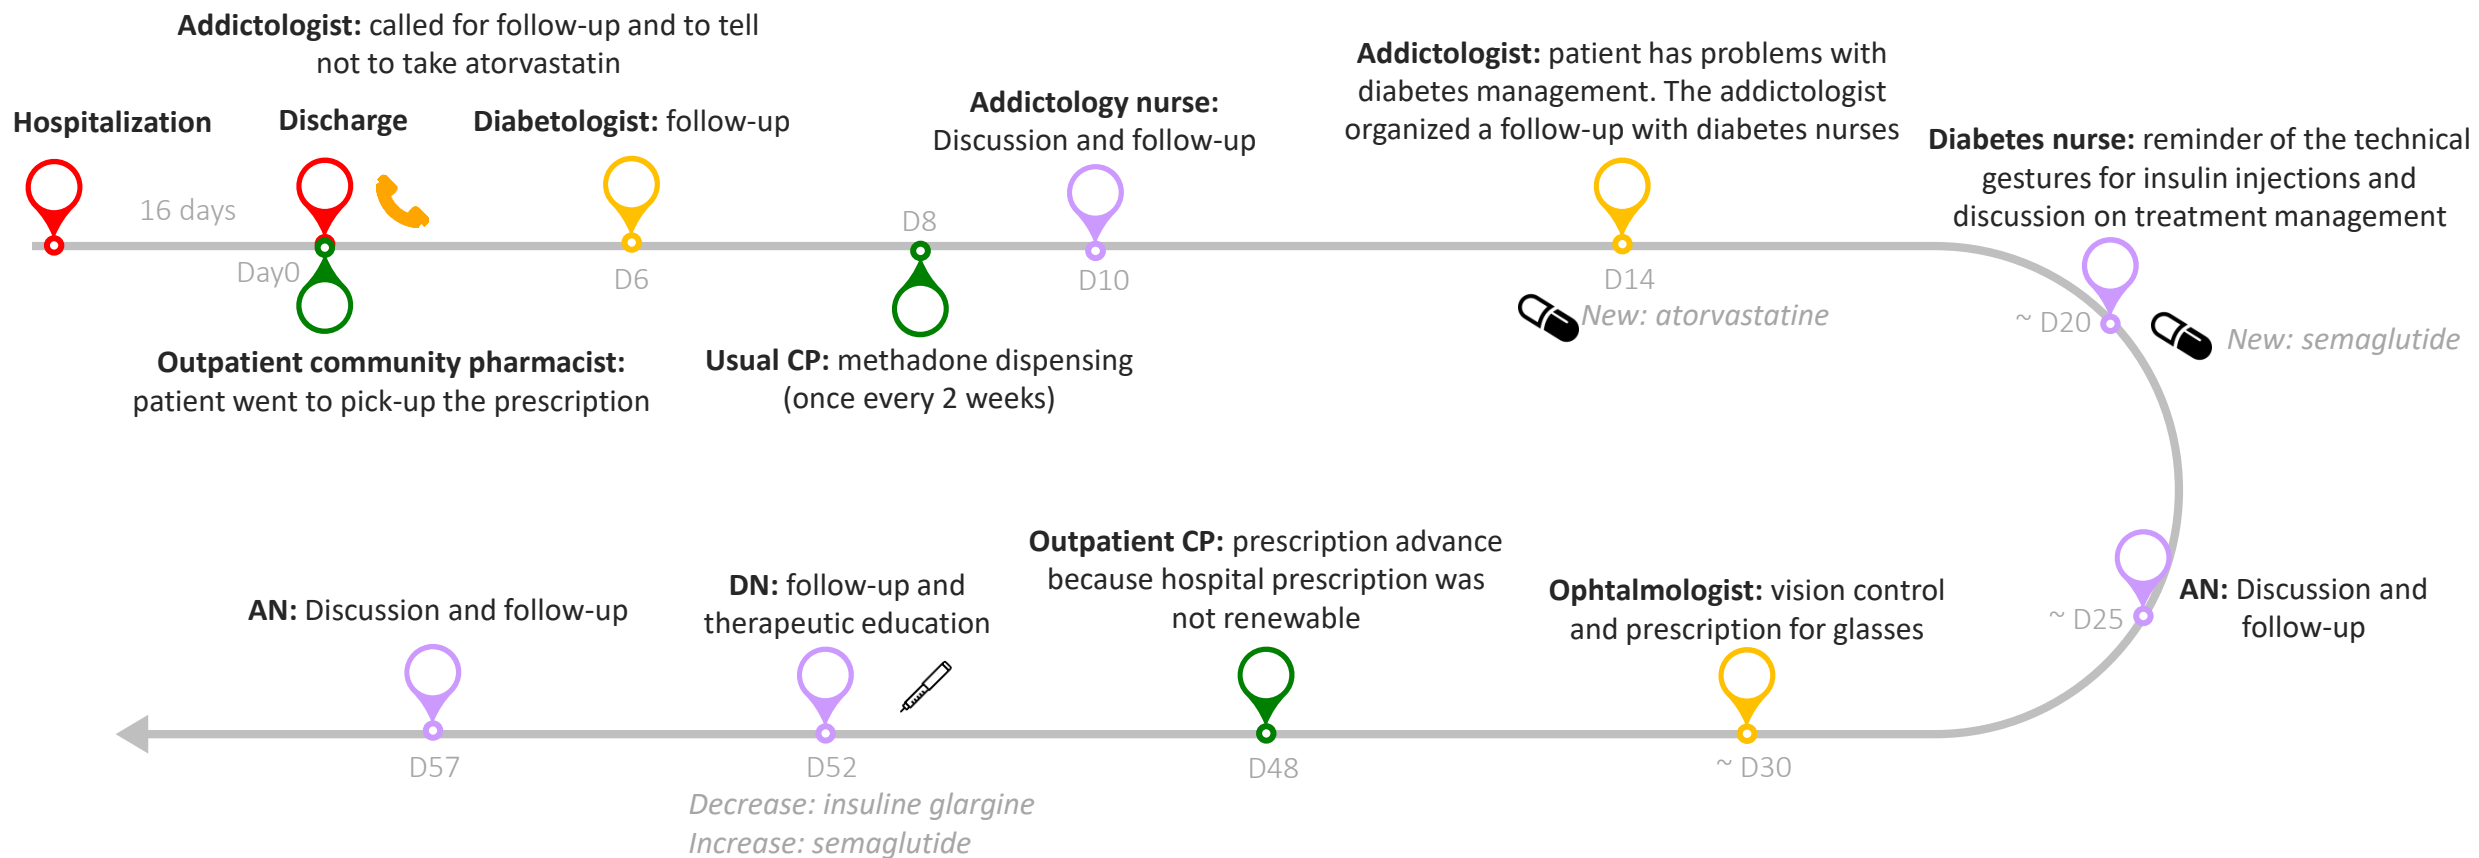

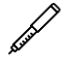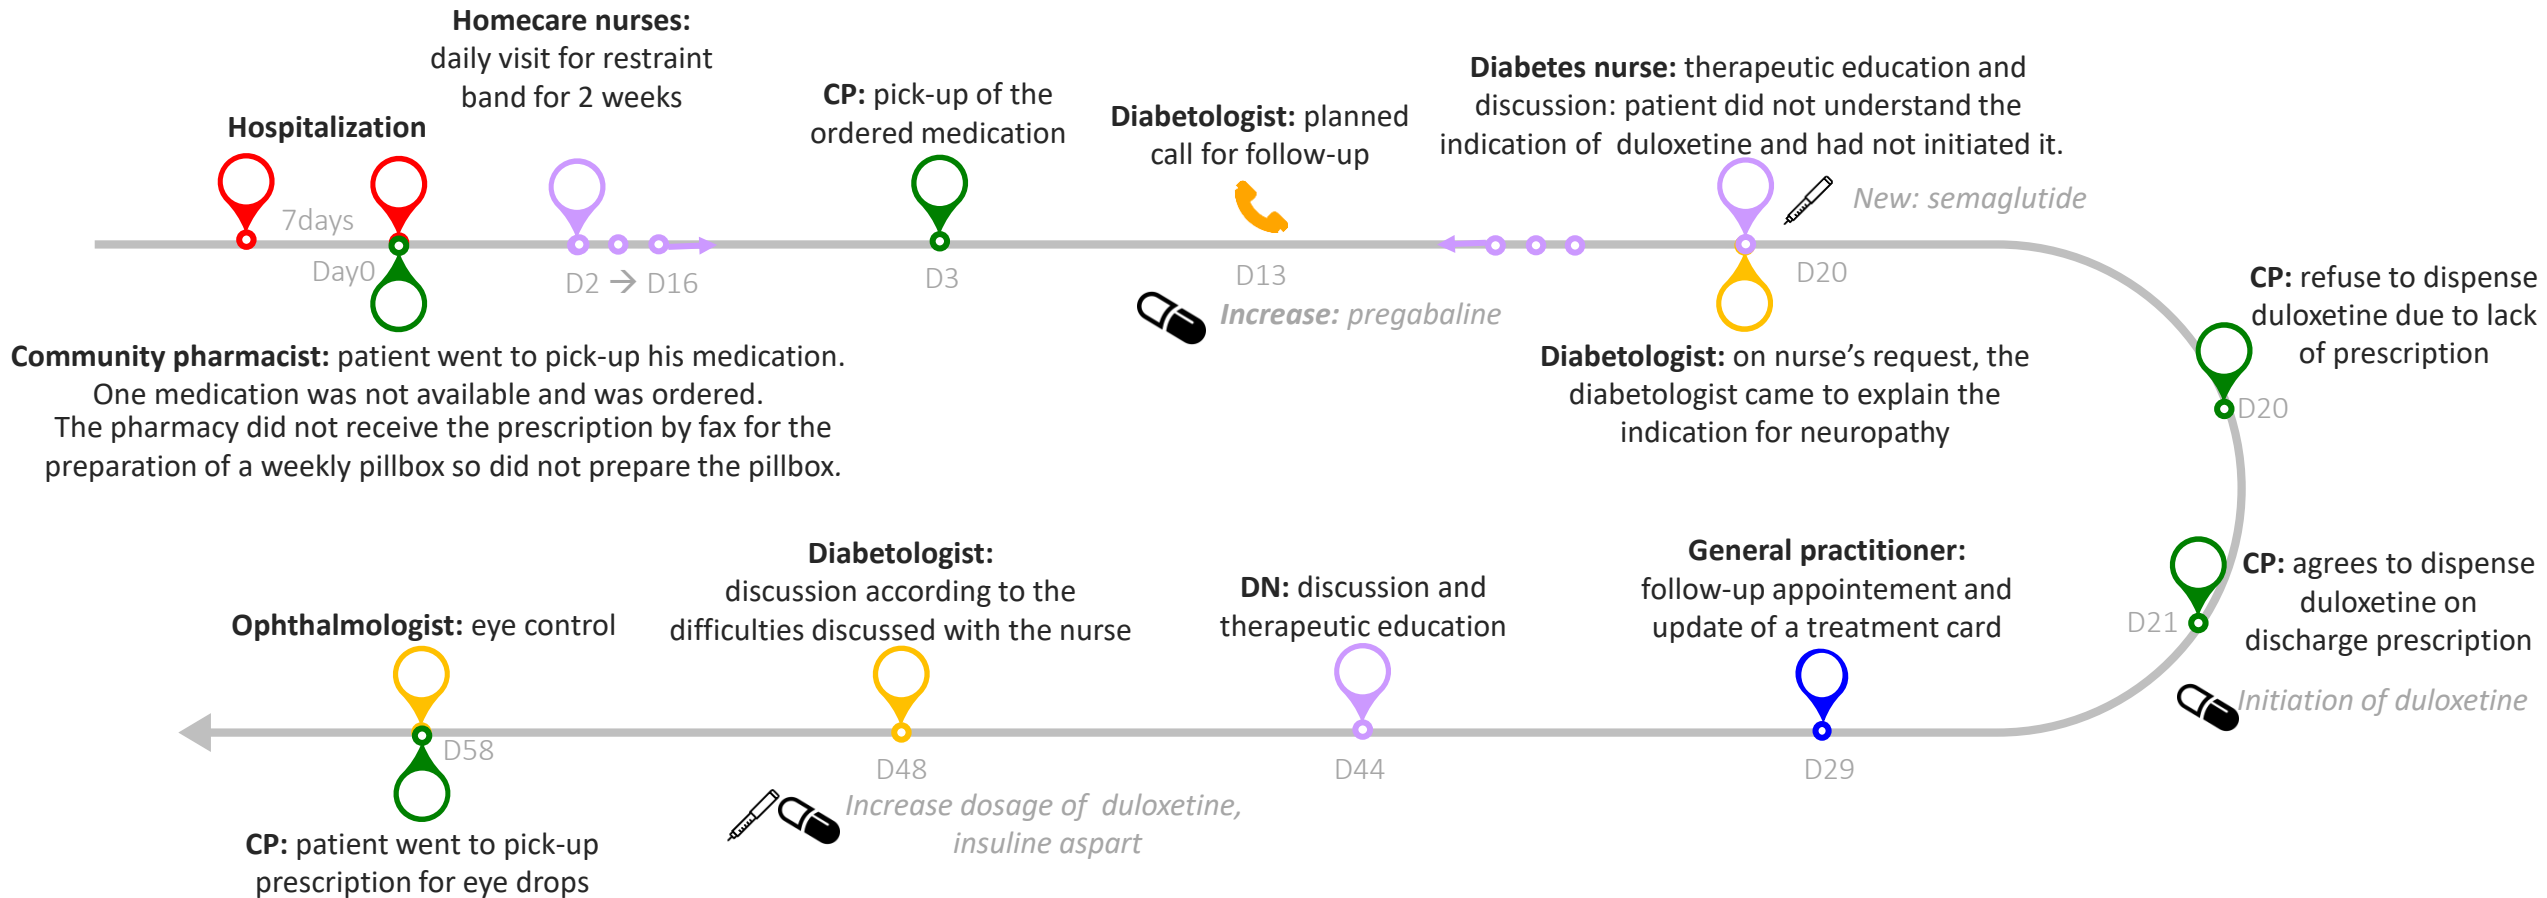

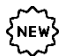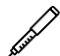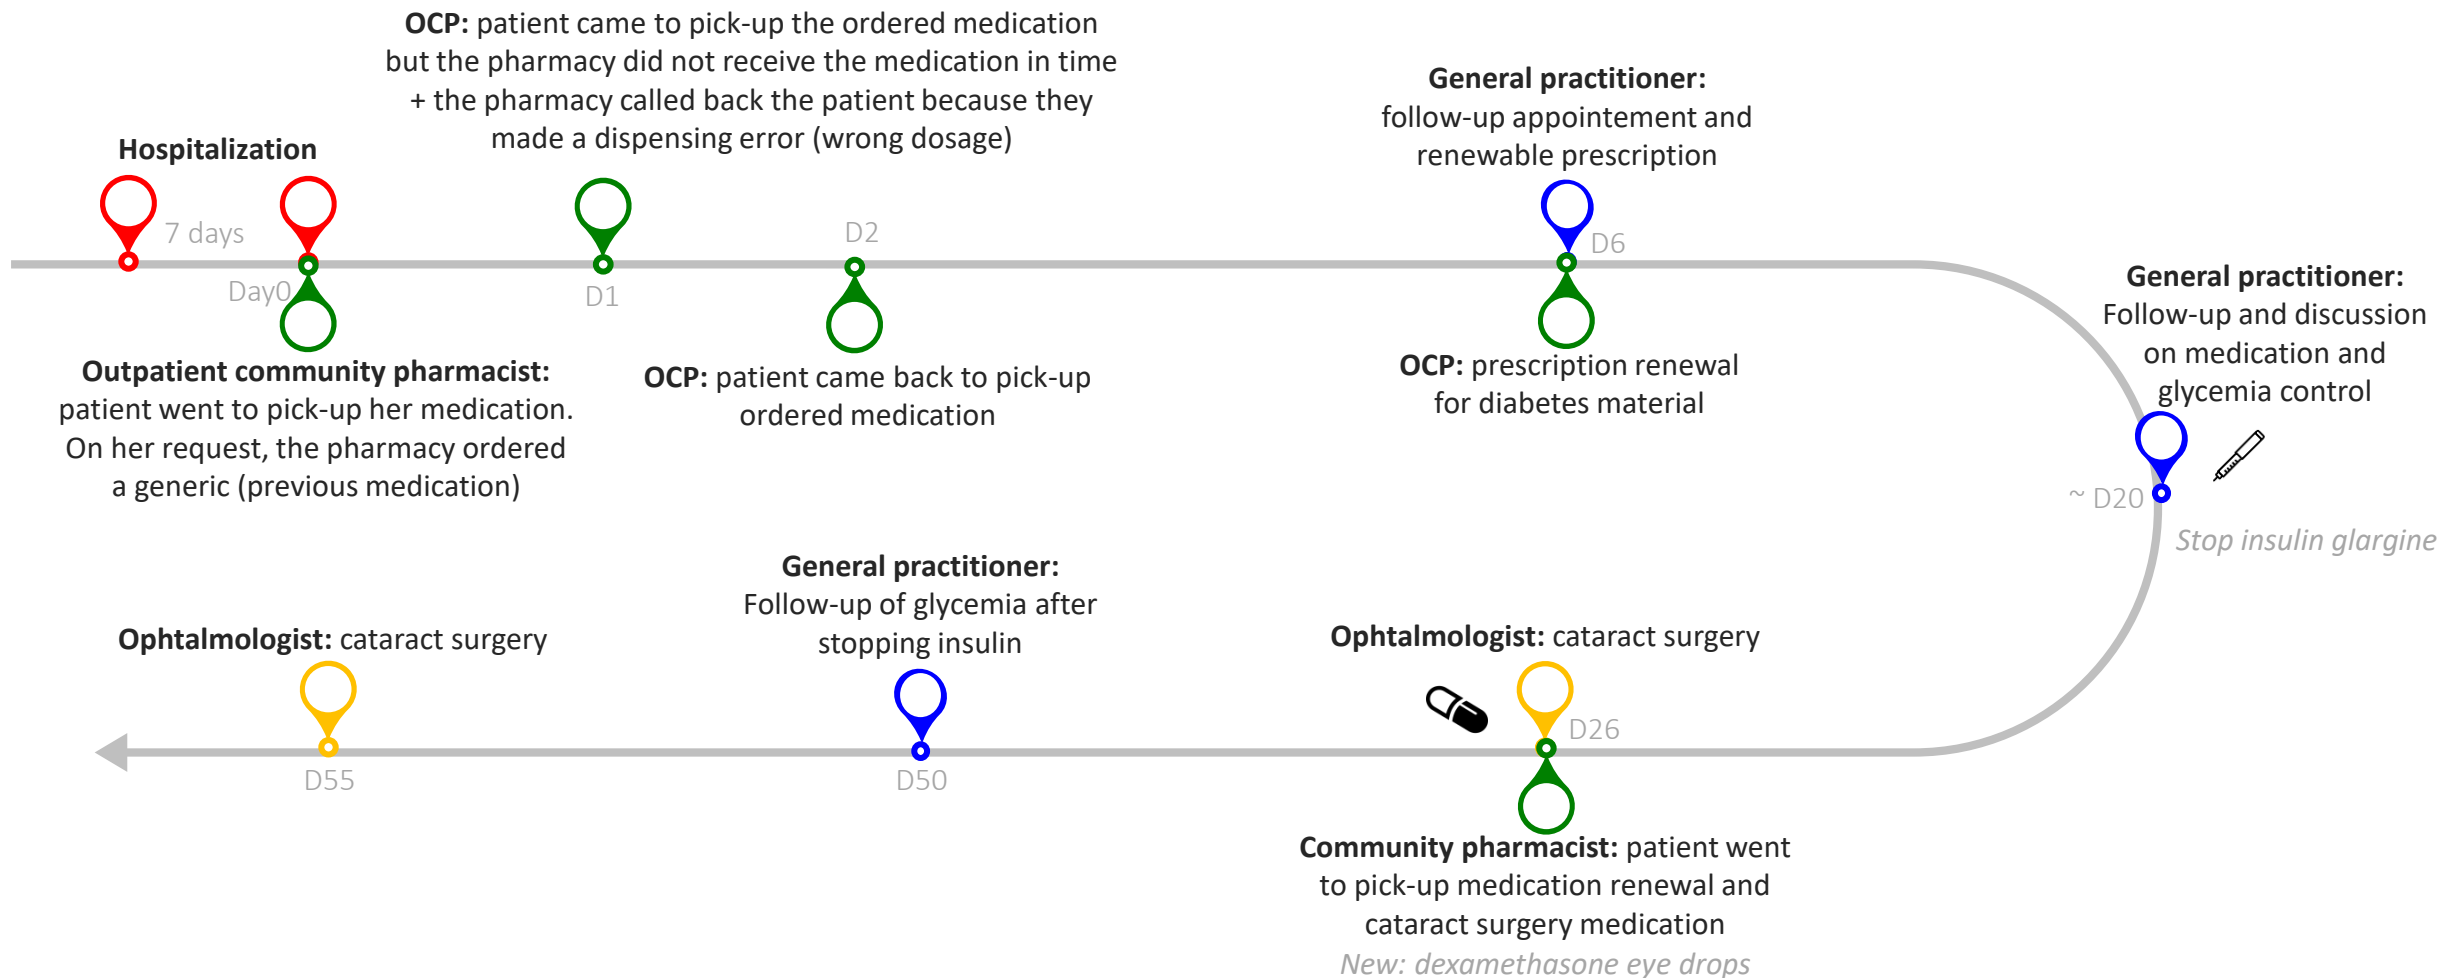

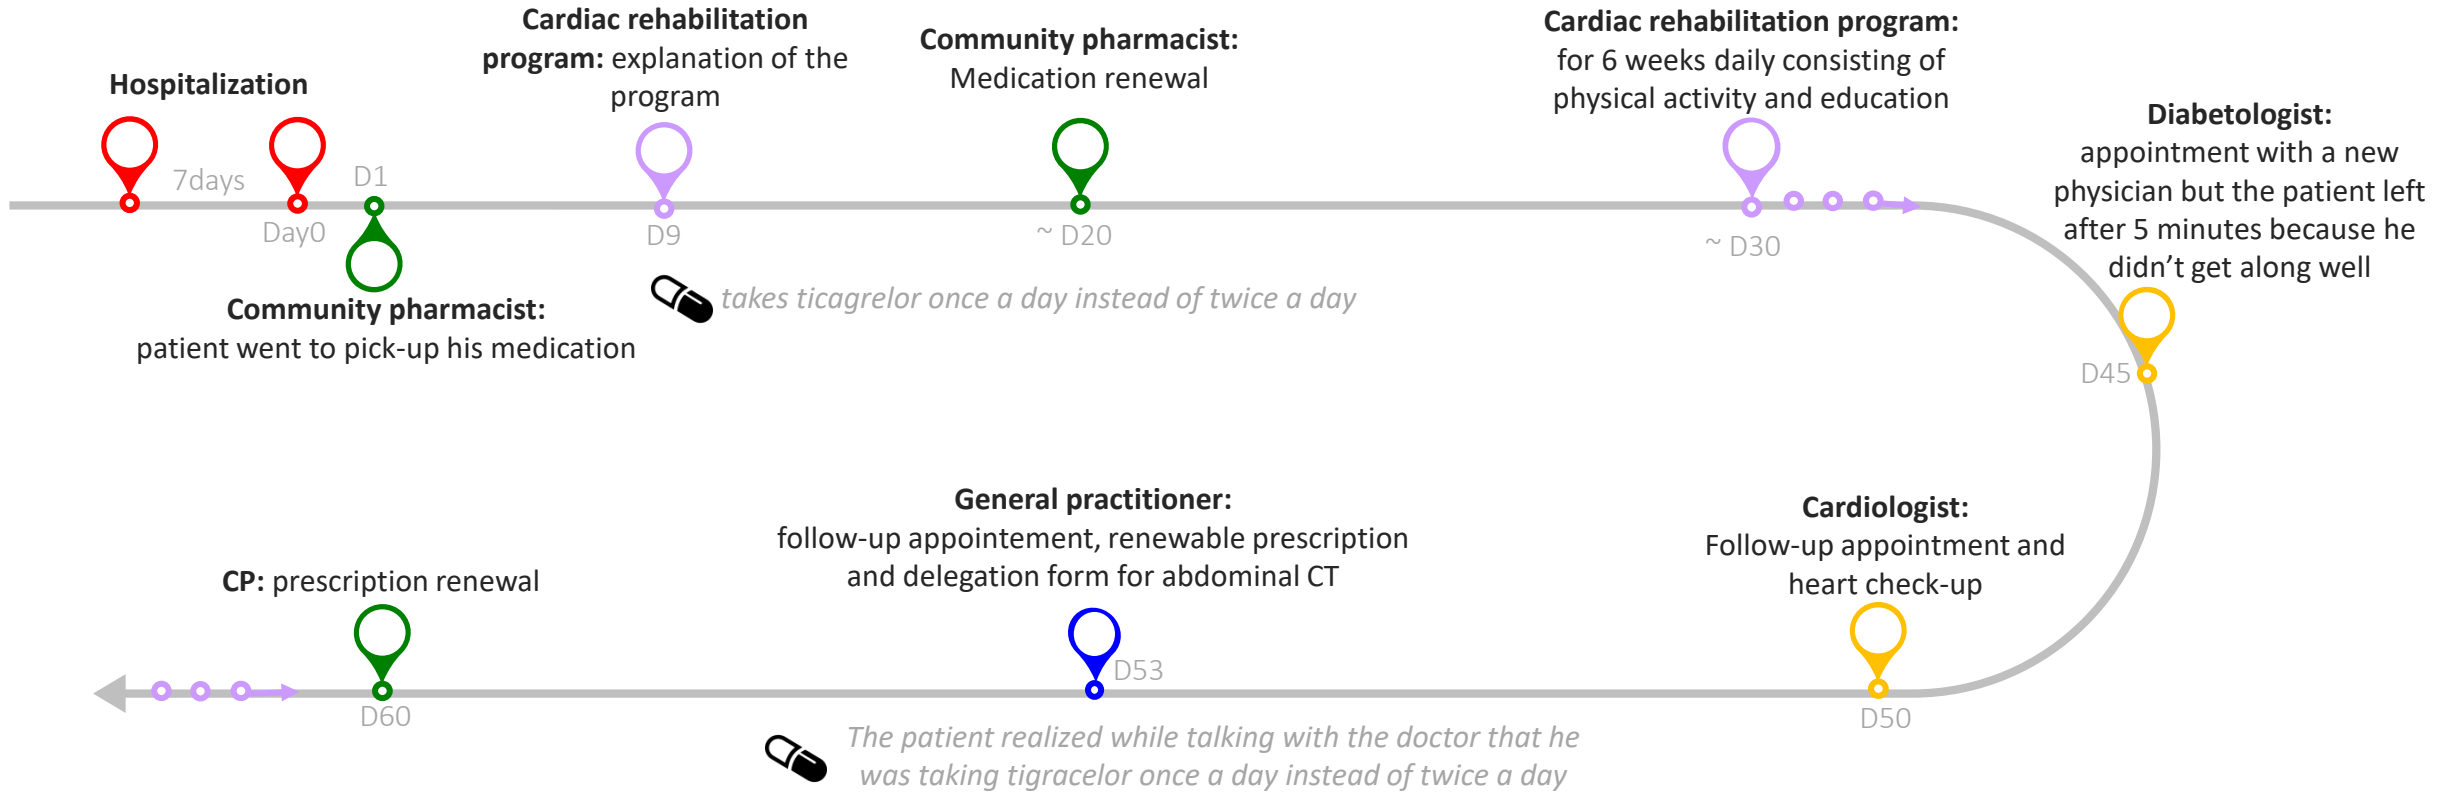

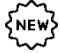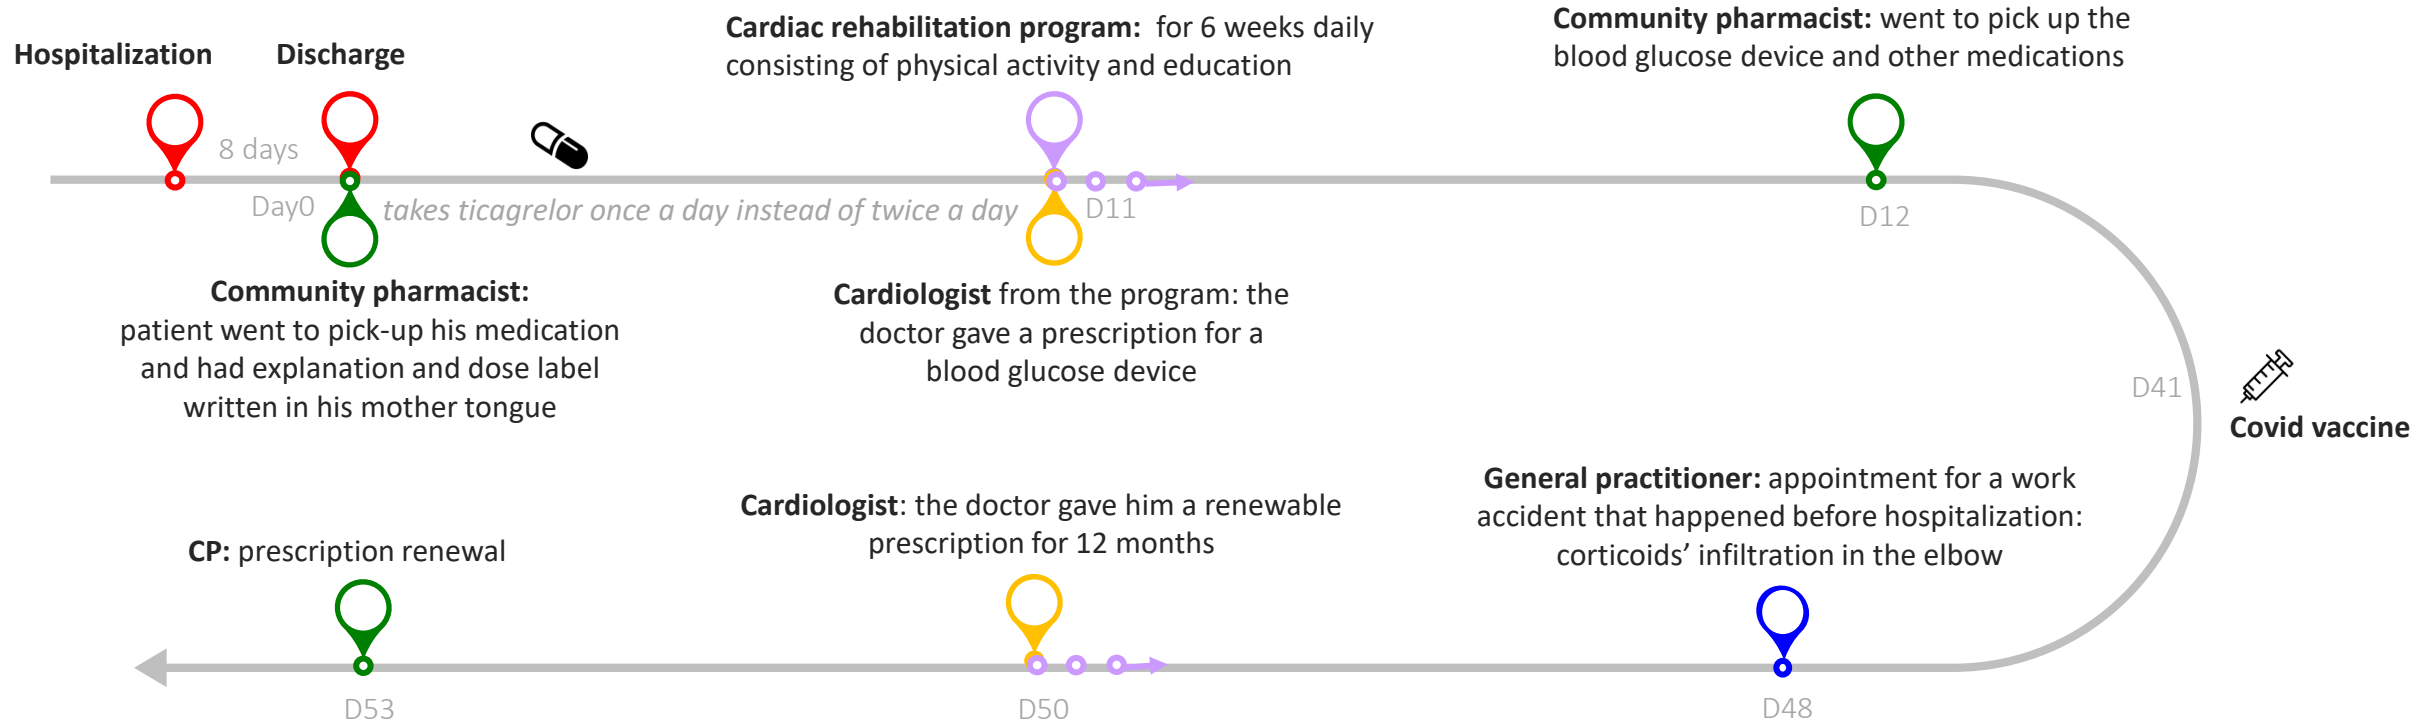



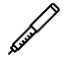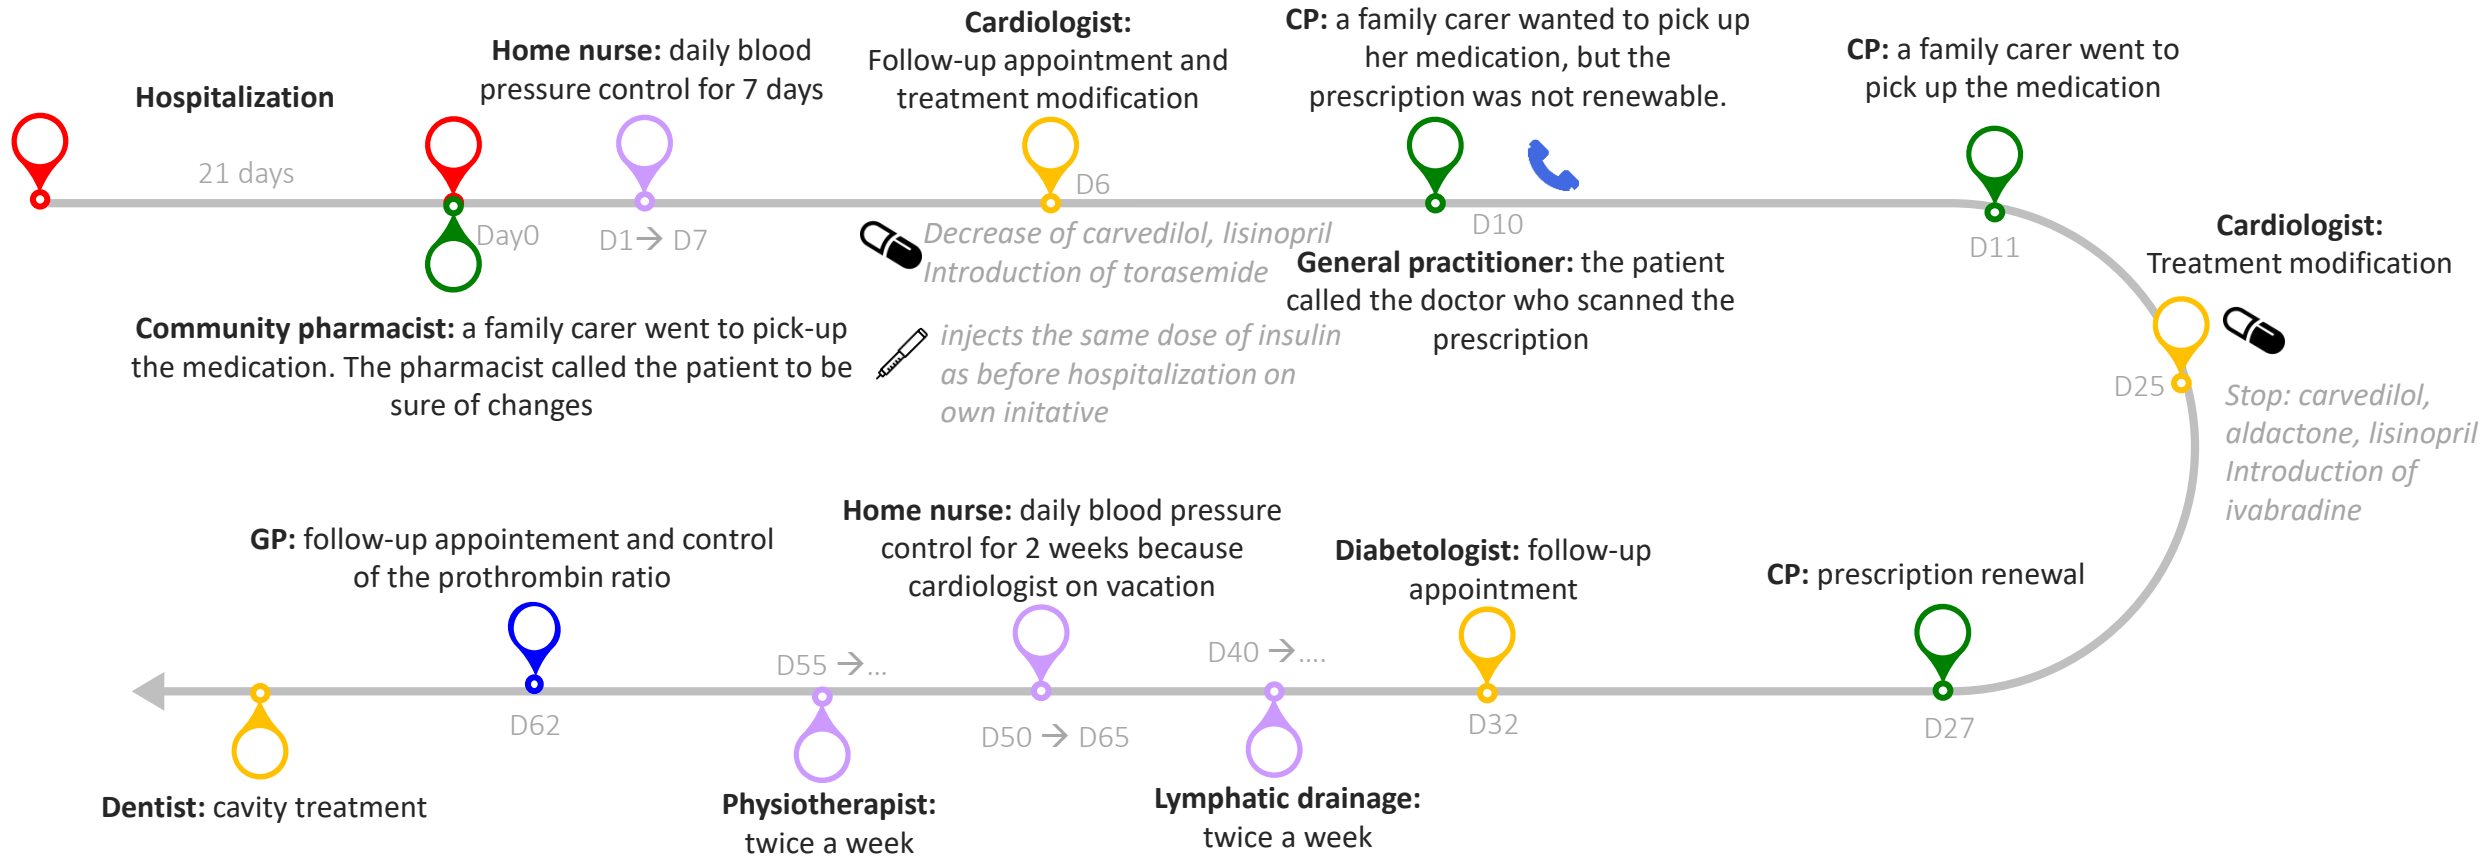

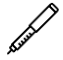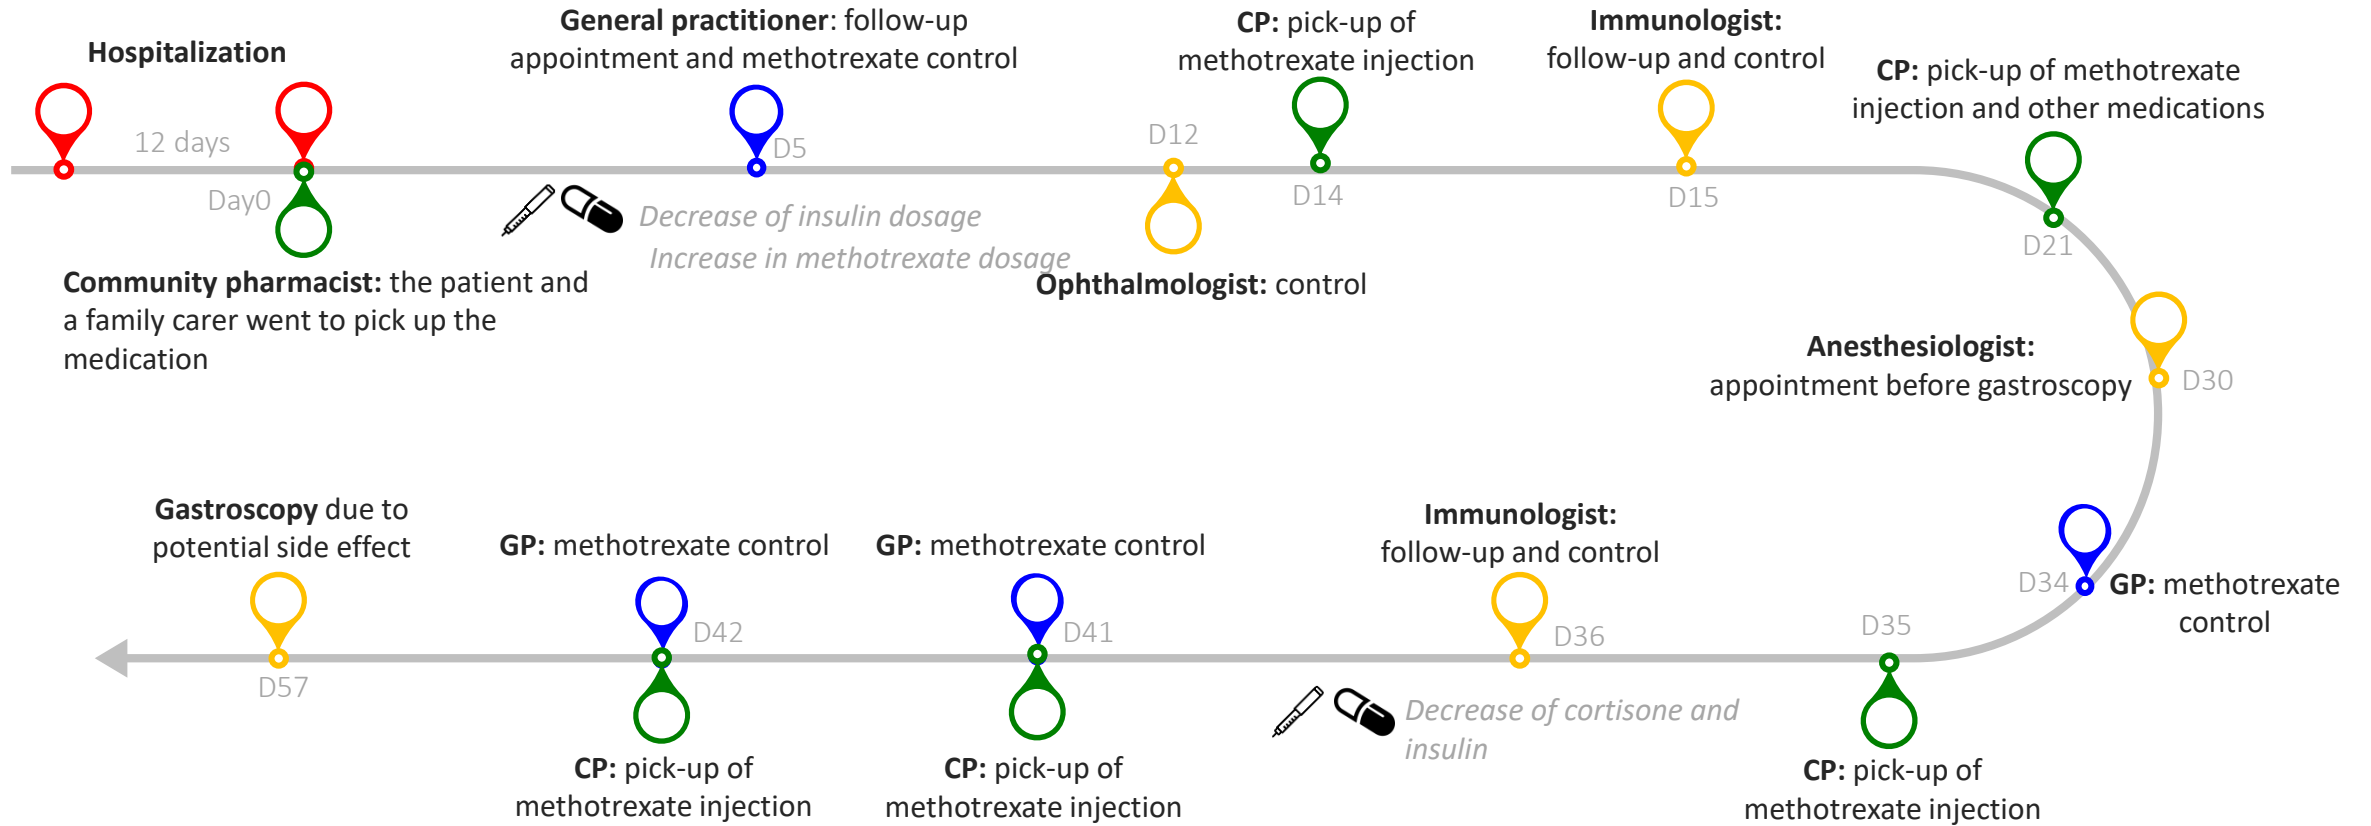

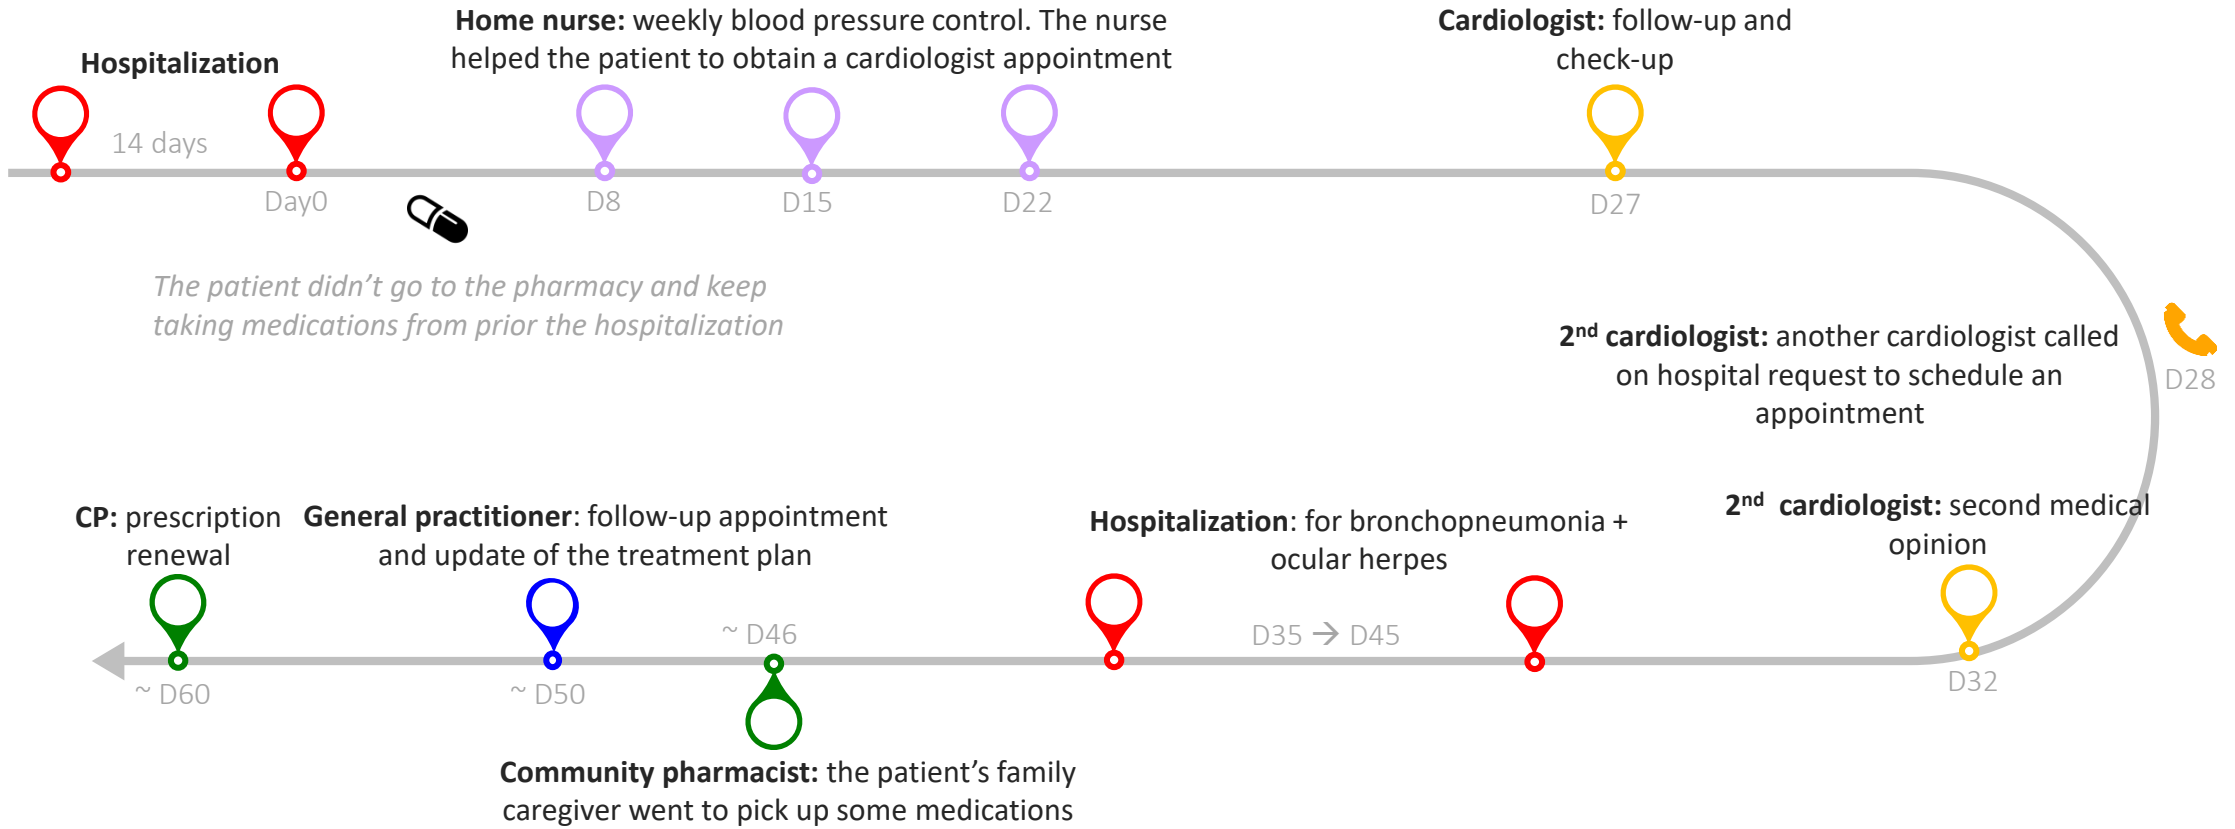

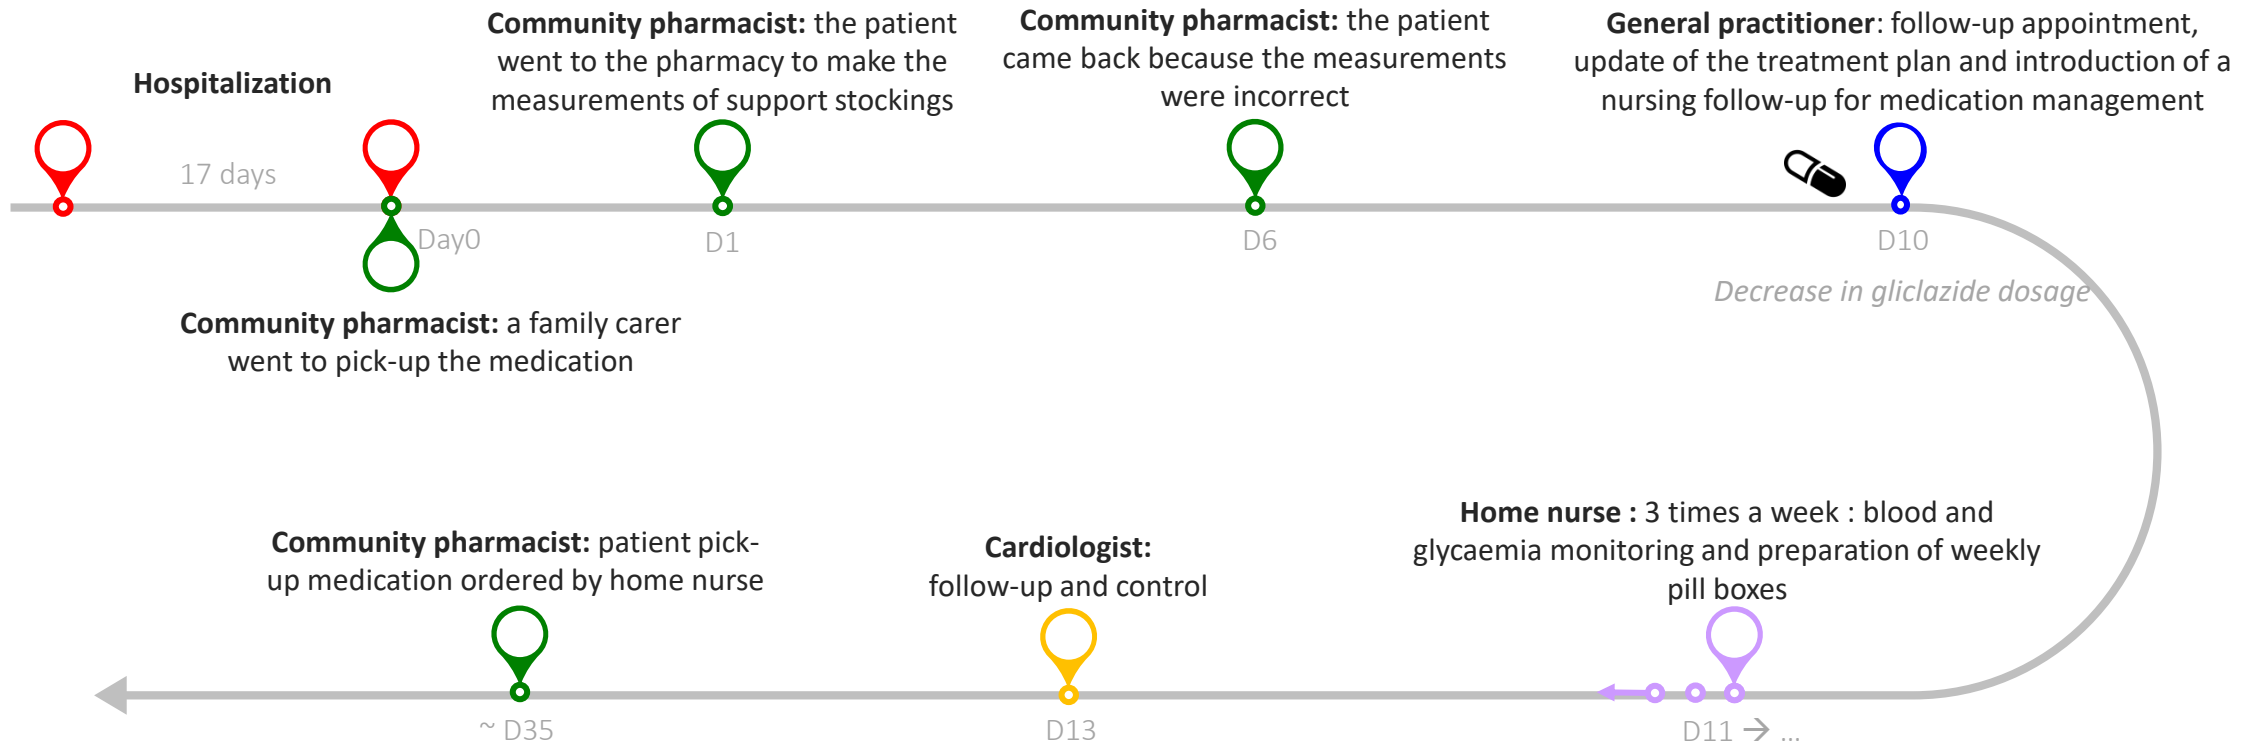

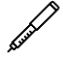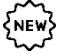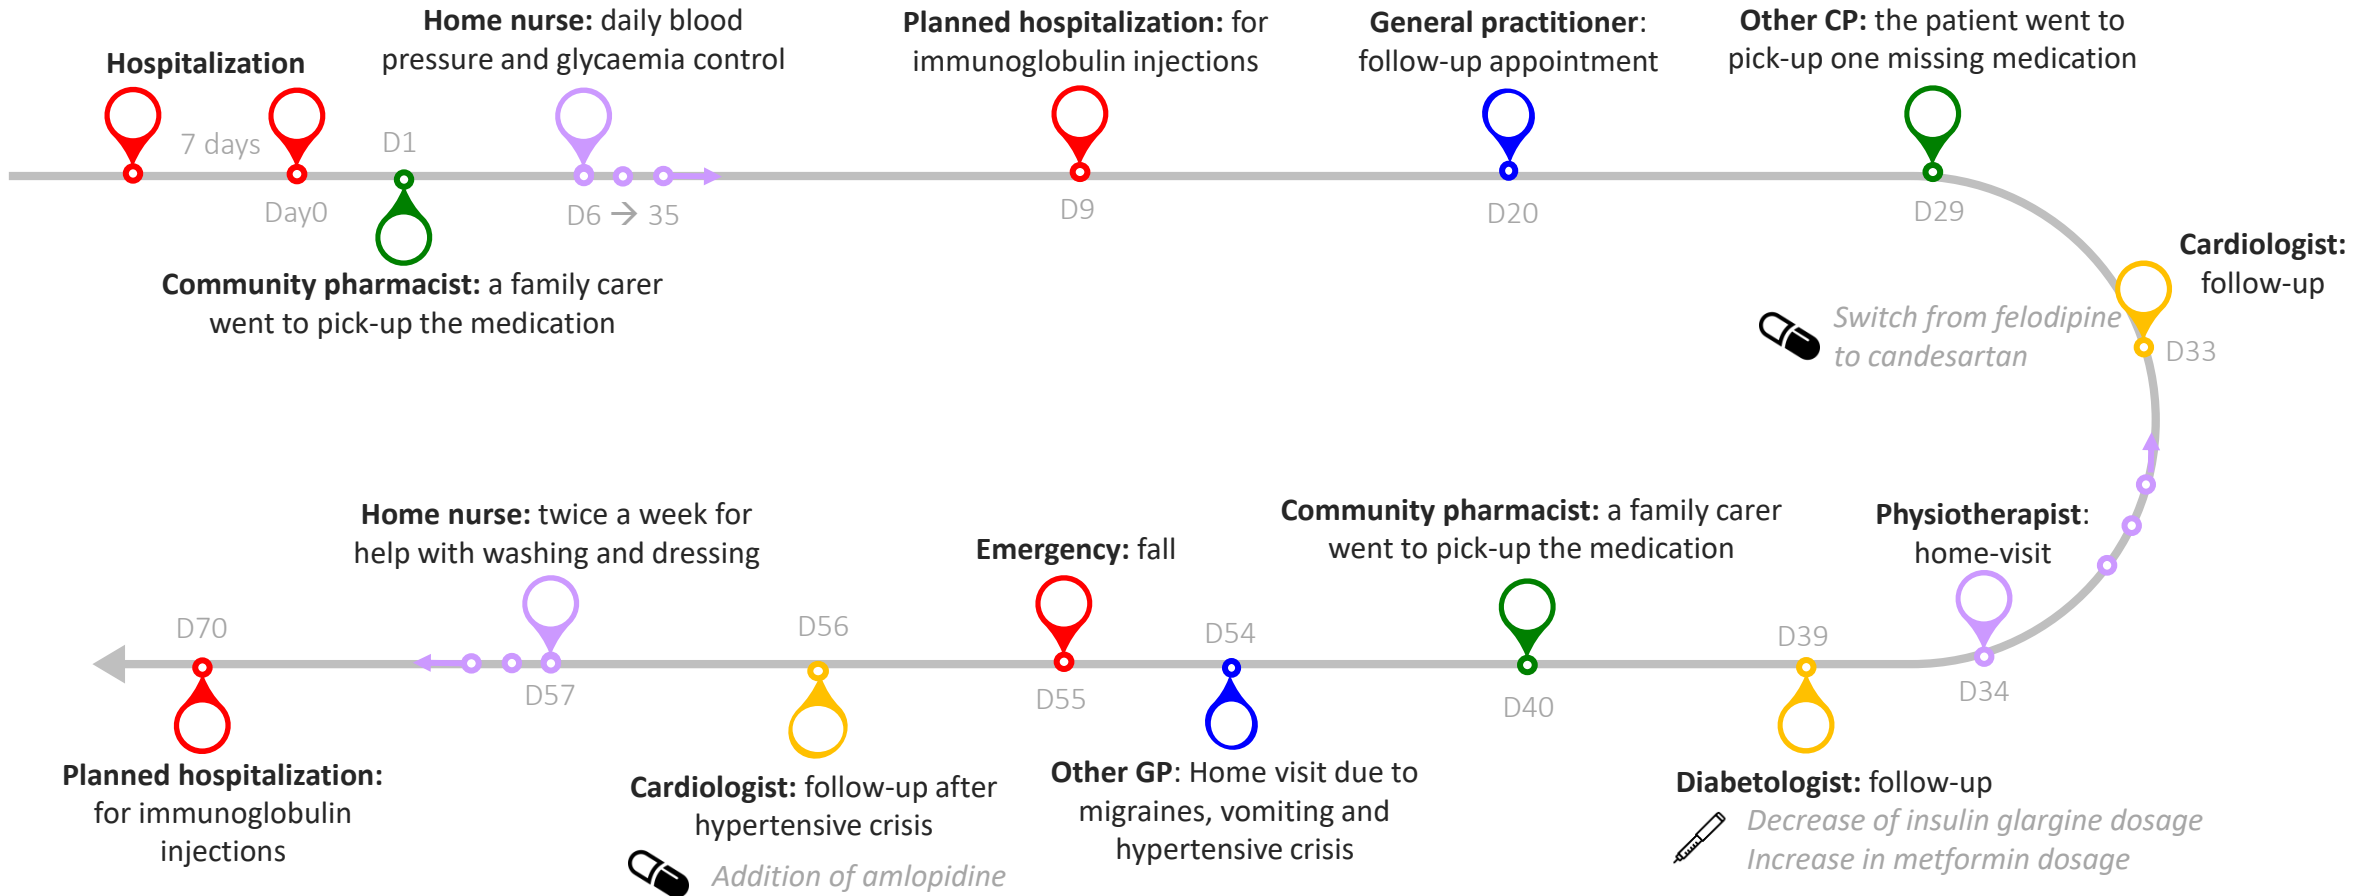

Supplement: MOESM2 [file 26990326]
