# Supplementary material for: Navigating outpatient care of patients with type 2 diabetes after hospital discharge - a qualitative longitudinal study
Source: Springer Nature journal article supplement (doi:10.1186/s12913-024-10959-4), 2024-04-17
Supplement: MOESM1 [file 26990326]

## Additional File 1- Interview guide translated from French to English

*Interview guides were translated from French; these guides are not validated for English use.*

### Interview 1: D3

PATIENT N° :

DATE :

PLACE: *home/telephone/video/University/other*

| Category                                                                                                                                                | Questions                                                                                                                                                             | comments |
|---------------------------------------------------------------------------------------------------------------------------------------------------------|-----------------------------------------------------------------------------------------------------------------------------------------------------------------------|----------|
| <i>You've been out of the hospital for 3 days. If you agree, I'm going to ask you a few questions about your experience since leaving the hospital.</i> |                                                                                                                                                                       |          |
| Experience of returning home                                                                                                                            | How was your return home?                                                                                                                                             |          |
| Preparing for discharge                                                                                                                                 | Has your <b>medication changed</b> between your admission in the hospital and the time you left? <b>What have you understood</b> about these changes/new medications? |          |
|                                                                                                                                                         | <b>What was your involvement</b> in the <b>changes</b> and <b>decisions</b> made while you were in the hospital?                                                      |          |
|                                                                                                                                                         | Looking back, how <b>would you describe</b> your <b>preparation</b> during your hospital stay in terms of managing your new treatment at home?                        |          |
|                                                                                                                                                         | What would you have liked to <b>know/wanted to know</b> about your medications <b>before going home</b> ?                                                             |          |
| <i>I'd like to talk to you about your support at home</i>                                                                                               |                                                                                                                                                                       |          |
| Caregiver                                                                                                                                               | Do you live <b>alone</b> or with/near relatives?                                                                                                                      |          |
|                                                                                                                                                         | <i>If alone:</i> <b>how are you coping with</b> this situation? If any, <b>what kind of help</b> would you need?                                                      |          |
|                                                                                                                                                         | <i>If living with others:</i> to what extent do <b>your family and friends help you</b> return home and manage your medication?                                       |          |
| Discharge prescription                                                                                                                                  | Did you (or a carer) <b>collect the medication on the discharge prescription</b> ?                                                                                    |          |
|                                                                                                                                                         | <i>if not:</i> <b>Why didn't</b> you collect your medication?                                                                                                         |          |

|                                                                                                                                                                                                                                                                                                             |                                                                                                                                                                                                                                                           |  |
|-------------------------------------------------------------------------------------------------------------------------------------------------------------------------------------------------------------------------------------------------------------------------------------------------------------|-----------------------------------------------------------------------------------------------------------------------------------------------------------------------------------------------------------------------------------------------------------|--|
|                                                                                                                                                                                                                                                                                                             |                                                                                                                                                                                                                                                           |  |
|                                                                                                                                                                                                                                                                                                             | <p><i>if yes :</i><br/> Can you <b>tell me more about</b> your experience at the pharmacy?<br/> <b>What did you find useful</b>, less useful, or even useless in what they told you?<br/> What did <b>you miss</b> during your visit to the pharmacy?</p> |  |
| <p><i>I'm now going to ask you a few questions about any health professionals you may have met since you got home.</i></p>                                                                                                                                                                                  |                                                                                                                                                                                                                                                           |  |
| Health professionals                                                                                                                                                                                                                                                                                        | <p><b>Which healthcare professional(s)</b> have you met since leaving the hospital? <i>e.g. doctors (GP, specialist), pharmacists (local, on-call), nurses, physiotherapist, etc.</i></p>                                                                 |  |
|                                                                                                                                                                                                                                                                                                             | <p><b>When</b> have you seen him.her?</p>                                                                                                                                                                                                                 |  |
|                                                                                                                                                                                                                                                                                                             | <p><b>Why have</b> you met with him.her?</p>                                                                                                                                                                                                              |  |
| Change of medication                                                                                                                                                                                                                                                                                        | <p>Could you show me your <b>medications/a list of the medications</b> you are taking at the moment?</p>                                                                                                                                                  |  |
|                                                                                                                                                                                                                                                                                                             | <p>Have any of your medications been <b>changed</b> or <b>stopped</b> since you returned home?</p>                                                                                                                                                        |  |
|                                                                                                                                                                                                                                                                                                             | <p><i>If so, which ones?</i><br/> What do you <b>know about the changes</b>?<br/> How do you feel about these changes (adaptation, change, satisfaction, confusion, etc.)?</p>                                                                            |  |
| <p><i>We're now going to take a look at how you manage your medications on a day-to-day basis. Some patients report having difficulties with their medication, whether it's a problem getting their medication, side effects, difficulties taking or using their medication, or other difficulties.</i></p> |                                                                                                                                                                                                                                                           |  |
| Medication self-management                                                                                                                                                                                                                                                                                  | <p><b>What difficulties</b> have you encountered with your medications/medical devices?<br/> <i>Examples: logistics, time of administration, forgetfulness, adverse events, interactions, difficulty of use, etc.</i></p>                                 |  |
|                                                                                                                                                                                                                                                                                                             | <p><i>If yes: In your opinion, what are the <b>causes of this/these difficulties(s)</b>?</i><br/> <b>How</b> do these difficulties affect your medicine management?<br/> Do you have any <b>solutions to help you overcome</b> these difficulties?</p>    |  |
|                                                                                                                                                                                                                                                                                                             | <p><i>We've talked about the difficulties of managing certain medications. What helps you manage and take your medication?</i><br/> <i>Examples: reminders, putting medications away in a particular place, rituals</i></p>                               |  |
| <p><i>We are coming to the end of our first interview:</i></p>                                                                                                                                                                                                                                              |                                                                                                                                                                                                                                                           |  |

|  |                                 |  |
|--|---------------------------------|--|
|  | Would you like to add anything? |  |
|--|---------------------------------|--|

*Notes*

## Interview 2: Day 10

PATIENT N°:

DATE:

PLACE: *home/telephone/video/University/other*

| Category                                                                                                     | Questions                                                                                                                                                                  | Comment |
|--------------------------------------------------------------------------------------------------------------|----------------------------------------------------------------------------------------------------------------------------------------------------------------------------|---------|
| <i>You've been back home for about ten days now. If you don't mind, I'd like to ask you a few questions.</i> |                                                                                                                                                                            |         |
| Introductory question                                                                                        | How have you been doing since we last spoke?                                                                                                                               |         |
| Health professionals                                                                                         | What healthcare <b>professional(s) have</b> you met since we last spoke? <i>e.g. doctors (GP, specialist), pharmacists (local, on-call), nurses, physiotherapist, etc.</i> |         |
|                                                                                                              | <b>When</b> did you see him/her?                                                                                                                                           |         |
|                                                                                                              | <b>Why did</b> you meet him/her?                                                                                                                                           |         |
| <i>We will now take a look at the medications you are taking and their management.</i>                       |                                                                                                                                                                            |         |
| Change of medication                                                                                         | Last time, we saw that you were taking : <i>list of medications</i>                                                                                                        |         |
|                                                                                                              | What medications are you currently taking?                                                                                                                                 |         |
|                                                                                                              | Have there been any <b>changes</b> to your medication since we last spoke?                                                                                                 |         |
|                                                                                                              | <i>If so, which ones?</i><br>What did you <b>know about the changes</b> ?<br>How do you feel about these changes (adaptation, change, satisfaction, confusion, etc.)?      |         |
|                                                                                                              | You told me last time that you were taking : <i>medication</i><br><br>and <b>you have not mentioned it to me today</b> . Why not?                                          |         |
| Information                                                                                                  | Which professional(s) have you <b>discussed</b> your <b>medication with</b> ?                                                                                              |         |
|                                                                                                              | <b>What information have you</b> received about your medication?                                                                                                           |         |
|                                                                                                              | Would you like <b>more</b> information?                                                                                                                                    |         |
|                                                                                                              | <i>if yes :</i><br>Which ones?                                                                                                                                             |         |

|                                                                                                                                                                                                                         |                                                                                                                                                                                                                                                                                                                        |  |
|-------------------------------------------------------------------------------------------------------------------------------------------------------------------------------------------------------------------------|------------------------------------------------------------------------------------------------------------------------------------------------------------------------------------------------------------------------------------------------------------------------------------------------------------------------|--|
|                                                                                                                                                                                                                         | <p><b>How could you</b> get them?<br/>Or whom or what could you turn to to get this information?</p>                                                                                                                                                                                                                   |  |
| Medication advice                                                                                                                                                                                                       | <p><i>We have talked about information that comes from health professionals (doctors, pharmacists).</i><br/>What about <b>advice</b> from <b>friends and family</b>?<br/>What about the advice you read on the <b>internet</b>?<br/>What kind of <b>emotions</b> did you feel when this happened to you?</p>           |  |
| Motivation                                                                                                                                                                                                              | What do you <b>expect from</b> your medications?                                                                                                                                                                                                                                                                       |  |
|                                                                                                                                                                                                                         | <b>What motivates</b> you to take your medication?                                                                                                                                                                                                                                                                     |  |
|                                                                                                                                                                                                                         | <b>How do people around</b> you <b>support</b> you in taking/managing your medication?                                                                                                                                                                                                                                 |  |
| <p><i>In our last discussion, we talked about the difficulties and the factors that made it easier for you to take your medication. We're going to go over them again today.</i></p>                                    |                                                                                                                                                                                                                                                                                                                        |  |
| Medication self-management                                                                                                                                                                                              | <p><i>Presentation of a summary of the last discussion.</i> How are these elements <b>evolving for</b> you at the moment?</p>                                                                                                                                                                                          |  |
|                                                                                                                                                                                                                         | <p><i>If the situation is improving:</i> what is <b>contributing to this improvement</b>? what have you done?<br/><i>If the difficulty is still present:</i> What are the <b>factors</b> or elements that make the <b>difficulty always</b> present? or <i>Why do you think the situation is always difficult?</i></p> |  |
|                                                                                                                                                                                                                         | <p>Since we last met, have there been any <b>new difficulties</b> with your medications?<br/><i>Example: logistics, time of intake, forgetfulness, side effects, drug-drug/drug-food interactions</i></p>                                                                                                              |  |
|                                                                                                                                                                                                                         | <p><i>If yes:</i> In your opinion, what are <b>the causes of</b> this/these difficulty(s)? How do these difficulties affect your medicine management?<br/>Do you have any <b>solutions to</b> help you overcome these difficulties?</p>                                                                                |  |
|                                                                                                                                                                                                                         | <b>What</b> helps you take/manage your medication?                                                                                                                                                                                                                                                                     |  |
| <p><i>Medication adherence means taking your medications as prescribed. There are many reasons why people do not necessarily take their medication every day, at the same time, and under the right conditions.</i></p> |                                                                                                                                                                                                                                                                                                                        |  |

|                                                   |                                                                                                                                                                                                                                                                                                                                                                                                                                                                                                         |  |
|---------------------------------------------------|---------------------------------------------------------------------------------------------------------------------------------------------------------------------------------------------------------------------------------------------------------------------------------------------------------------------------------------------------------------------------------------------------------------------------------------------------------------------------------------------------------|--|
| Medication adherence                              | <p>According to you, what is/are <b>the most difficult medication(s)</b> you have to take at the moment?<br/> Can you describe a situation or a period when you <b>didn't take your medication or when it was difficult to take your medication</b>? How <b>often does</b> this happen? Under what <b>circumstances</b>?<br/> Are there <b>other difficult situations</b>? If so, which ones?<br/> Can you remember the <b>last time you didn't take your medicine(s)</b>? How did you <b>feel</b>?</p> |  |
|                                                   | <p>What factors make it easier for you to take/manage your medications (e.g. practical, emotional, linked to the treatment, to the healthcare system)?</p>                                                                                                                                                                                                                                                                                                                                              |  |
| <i>We are coming to the end of our interview:</i> |                                                                                                                                                                                                                                                                                                                                                                                                                                                                                                         |  |
|                                                   | <p>What could be put in <b>place</b> to make your day-to-day medication <b>management easier</b>?</p>                                                                                                                                                                                                                                                                                                                                                                                                   |  |
|                                                   | <p>What do you think of the usefulness of <b>electronic tools</b>?<br/> <i>e.g. application, alarm, website</i></p>                                                                                                                                                                                                                                                                                                                                                                                     |  |
|                                                   | <p>Would you like to add anything?</p>                                                                                                                                                                                                                                                                                                                                                                                                                                                                  |  |

Notes:

### Interview 3: D30

PATIENT N°:

DATE:

PLACE: *home/telephone/video/University/other*

| Category                                                                                                                                                                  | Questions                                                                                                                                                                         | Comment |
|---------------------------------------------------------------------------------------------------------------------------------------------------------------------------|-----------------------------------------------------------------------------------------------------------------------------------------------------------------------------------|---------|
| <i>You've been back home for a month now. If you don't mind, I'd like to ask you a few questions.</i>                                                                     |                                                                                                                                                                                   |         |
| Introductory question                                                                                                                                                     | How have you been doing since we last spoke?                                                                                                                                      |         |
| Health professionals                                                                                                                                                      | Which healthcare <b>professional(s)</b> have you met since we last spoke? <i>e.g. doctors (GP, specialist types), pharmacists (local, on-call), nurses, physiotherapist, etc.</i> |         |
|                                                                                                                                                                           | <b>When</b> did you see him/her?                                                                                                                                                  |         |
|                                                                                                                                                                           | <b>Why did</b> you meet him/her?                                                                                                                                                  |         |
| <i>We will now take a look at the medications you are taking and how you manage them.</i>                                                                                 |                                                                                                                                                                                   |         |
| Change of medication                                                                                                                                                      | Last time, we saw that you were <b>taking</b> : <i>list of medications</i>                                                                                                        |         |
|                                                                                                                                                                           | What is the situation today?                                                                                                                                                      |         |
|                                                                                                                                                                           | <b>Have there been any changes in</b> your medication since we last spoke?                                                                                                        |         |
|                                                                                                                                                                           | <i>If so, which ones?</i><br>What did you <b>know about the changes</b> ?<br>How do you feel about these changes (adaptation, change, satisfaction, confusion, etc.)?             |         |
|                                                                                                                                                                           | <i>If stopping medication: The last time you took: medication</i><br><br>and <b>you didn't mention it to me</b> . Why not?                                                        |         |
| <i>In our last discussion, we talked about the difficulties and factors that make it easier for you to take your medication. We're going to go over them again today.</i> |                                                                                                                                                                                   |         |
| Medication self-management                                                                                                                                                | <i>Presentation of a summary of the last discussion.</i> How are these elements <b>evolving for</b> you at the moment?                                                            |         |
|                                                                                                                                                                           | <i>If the situation is improving:</i> what is <b>contributing to this improvement</b> ? what have you done?                                                                       |         |

|                                                                                                                                                                                  |                                                                                                                                                                                                                                                  |  |
|----------------------------------------------------------------------------------------------------------------------------------------------------------------------------------|--------------------------------------------------------------------------------------------------------------------------------------------------------------------------------------------------------------------------------------------------|--|
|                                                                                                                                                                                  | <i>If the difficulty is still present:</i> What are the <b>factors</b> or elements that make the <b>difficulty always present?</b> or <i>Why do you think the situation is still difficult?</i>                                                  |  |
|                                                                                                                                                                                  | Since we last met, have there been any <b>new difficulties</b> with your medication?                                                                                                                                                             |  |
|                                                                                                                                                                                  | <i>If yes :</i><br>In your opinion, what are <b>the causes of</b> this/these difficulties?<br><b>To what extent do</b> these difficulties affect your medicine management?<br>Do you have any solutions to help you overcome these difficulties? |  |
| Storage of medications                                                                                                                                                           | Where and how do you store your medications?                                                                                                                                                                                                     |  |
|                                                                                                                                                                                  | Does this <b>help</b> you or make it <b>more difficult</b> for managing your medication? <b>Why or why not?</b>                                                                                                                                  |  |
| <i>I'd now like to talk to you about the relationship you have with your doctor and your pharmacist, and how important these relationships are in managing your medications.</i> |                                                                                                                                                                                                                                                  |  |
| Healthcare professionals                                                                                                                                                         | Since you returned home, could you describe a <b>situation/interaction</b> with a healthcare professional that you think <b>went well</b> and why it was beneficial to you?                                                                      |  |
|                                                                                                                                                                                  | What about a situation that <b>didn't go so well?</b>                                                                                                                                                                                            |  |
|                                                                                                                                                                                  | How important is your <b>relationship</b> with your <b>GP in terms of</b> your day-to-day use of medication?                                                                                                                                     |  |
| Pharmacy                                                                                                                                                                         | Do you always go to the <b>same</b> pharmacy?                                                                                                                                                                                                    |  |
|                                                                                                                                                                                  | <i>If so, why <b>are you loyal to</b> this pharmacy?</i><br><i>If not, why are <b>you changing pharmacies?</b></i>                                                                                                                               |  |
|                                                                                                                                                                                  | What <b>role</b> does <b>the pharmacist play</b> in <b>managing your medications?</b>                                                                                                                                                            |  |
|                                                                                                                                                                                  | <b>How</b> can the <b>pharmacist</b> better help you <b>manage/understand</b> your medications?                                                                                                                                                  |  |
|                                                                                                                                                                                  | How would you describe the <b>communication</b> and exchange of information between your <b>pharmacist and your doctor?</b>                                                                                                                      |  |
| <i>We are coming to the end of our interview:</i>                                                                                                                                |                                                                                                                                                                                                                                                  |  |
|                                                                                                                                                                                  | Would you like to add anything?                                                                                                                                                                                                                  |  |

**Notes**



**Interview 4: Day 60**

PATIENT N°:

DATE:

PLACE: *home/telephone/video/University/other*

| Categories            | Questions                                                                                                                                                            | Comment |
|-----------------------|----------------------------------------------------------------------------------------------------------------------------------------------------------------------|---------|
|                       | <i>You've been back home for almost 2 months now. This is our last interview together. If you don't mind, I'd like to ask you a few questions.</i>                   |         |
| Introductory question | <b>How have</b> you been <b>feeling</b> since we last spoke?                                                                                                         |         |
| Health professionals  | Which <b>healthcare professional(s)</b> have you met since we last spoke?                                                                                            |         |
|                       | <b>When</b> did you meet him/her?                                                                                                                                    |         |
|                       | <b>Why did</b> you meet him/her?                                                                                                                                     |         |
|                       | <i>We will now look together at the medications you are taking and how they are managed.</i>                                                                         |         |
| Change of medication  | Last time, we saw that you were <b>taking</b> : <i>list of medication</i>                                                                                            |         |
|                       | What is the situation <b>today</b> ?                                                                                                                                 |         |
|                       | <b>Have there been any changes in</b> your medication since we last spoke?                                                                                           |         |
|                       | <i>If so, which ones?</i><br>What do you <b>know about the changes</b> ?<br>How do you feel about these changes (adaptation, change, satisfaction, confusion, etc.)? |         |
|                       | <i>If stopping medication: The last time you <b>took</b>: medication</i><br><br>and you <b>didn't mention it to</b> me. Why not?                                     |         |
| Information           | Which professional(s) have you <b>discussed your medication with</b> ?                                                                                               |         |
|                       | What <b>information did</b> you receive about your <b>medication</b> ?                                                                                               |         |
|                       | Would you like <b>more information</b> ?                                                                                                                             |         |
|                       | <i>if yes :</i><br><b>Which ones</b> ?<br><b>How</b> can you get them?<br>Who or what could you turn to for this information?                                        |         |
| Motivation            | A few weeks ago, we talked about <b>your expectations of your medication</b> . I'd like to know <b>how your expectations of your medication have evolved</b> .       |         |
|                       | What about <b>your motivation to</b> take your medication?                                                                                                           |         |

|                                                                                                                                                                                                        |                                                                                                                                                                                                                                                                                                                                                                           |  |
|--------------------------------------------------------------------------------------------------------------------------------------------------------------------------------------------------------|---------------------------------------------------------------------------------------------------------------------------------------------------------------------------------------------------------------------------------------------------------------------------------------------------------------------------------------------------------------------------|--|
| Medication self-management                                                                                                                                                                             | <i>Presentation of a summary of the last discussion.</i><br>How are these elements <b>evolving for</b> you at the moment?                                                                                                                                                                                                                                                 |  |
|                                                                                                                                                                                                        | <i>If the situation is improving:</i> what is <b>contributing to</b> this improvement? what have you done?<br><i>If the difficulty is still present:</i> What are the factors or elements that make <b>the difficulty always</b> present? or<br><i>Why do you think the situation is always difficult?</i>                                                                |  |
|                                                                                                                                                                                                        | Since we last met, have there been any <b>new difficulties</b> with your medication?                                                                                                                                                                                                                                                                                      |  |
|                                                                                                                                                                                                        | In your opinion, what are the <b>causes of this/these difficulties(s)</b> ?                                                                                                                                                                                                                                                                                               |  |
|                                                                                                                                                                                                        | To what extent do these difficulties affect your medicine management?                                                                                                                                                                                                                                                                                                     |  |
| <i>A few weeks ago we talked about therapeutic adherence, i.e. how you take your medication as prescribed. (Read a summary of the last interview)</i>                                                  |                                                                                                                                                                                                                                                                                                                                                                           |  |
| Medication adherence                                                                                                                                                                                   | How are these elements <b>evolving for</b> you at the moment?<br><i>If the situation is improving:</i> what is <b>contributing to</b> this improvement?<br><i>If adherence problems:</i> Which <b>medication(s)</b> is/are the <b>most difficult to take</b> ? Can you tell me about a time when it was <b>difficult to</b> take your medication(s)?<br>How did you feel? |  |
| <i>Looking back on your journey from hospital discharge to now, 2 months later, I'd like to ask you a few questions about how you navigated the healthcare system and how your needs have changed.</i> |                                                                                                                                                                                                                                                                                                                                                                           |  |
| General view: journey                                                                                                                                                                                  | What are the <b>greatest difficulties you have</b> encountered in <b>your journey</b> through the healthcare system <b>since leaving the hospital? With your medications?</b>                                                                                                                                                                                             |  |
|                                                                                                                                                                                                        | What <b>ideas do you have to</b> improve the journey?                                                                                                                                                                                                                                                                                                                     |  |
| General view: support                                                                                                                                                                                  | <i>We've talked about the difficulties you've encountered and your needs in terms of information, skills, and motivation about your medication. How <b>would you describe the evolution of your needs</b> in terms of <b>medication self-management</b> from the time you returned home until now?</i>                                                                    |  |
|                                                                                                                                                                                                        | <b>How</b> have healthcare <b>professionals supported</b> you to <b>meet your treatment needs</b> over the last two months?                                                                                                                                                                                                                                               |  |
|                                                                                                                                                                                                        | What could <b>improve this support</b> and collaboration?                                                                                                                                                                                                                                                                                                                 |  |
| <i>We are coming to the end of our interview:</i>                                                                                                                                                      |                                                                                                                                                                                                                                                                                                                                                                           |  |
|                                                                                                                                                                                                        | Would you like to add anything?                                                                                                                                                                                                                                                                                                                                           |  |

Notes
